# Supplementary material for: Environmental DNA metabarcoding to detect pathogenic Leptospira and associated organisms in leptospirosis-endemic areas of Japan
Source: PubMed Central journal article supplement (PMC6484013; doi:10.1038/s41598-019-42978-1), 2019-04-25
Supplement: 41598_2019_42978_MOESM1_ESM.pdf [file 41598_2019_42978_MOESM1_ESM.pdf]

## Supplementary Information

### Environmental DNA metabarcoding to detect pathogenic *Leptospira* and associated organisms in leptospirosis-endemic areas of Japan

Yukuto Sato, Masaru Mizuyama, Megumi Sato, Toshifumi Minamoto, Ryosuke Kimura, Claudia Toma

**Supplementary Table S1.** Sample labels, locations and dates of sampling, and concentration and quality of the extracted DNA.

| Sample name | Location <sup>a</sup> | Date of sampling and filtration | Date of DNA extraction | DNA concentration (ng/ $\mu$ L) | OD <sub>260/280</sub> |
|-------------|-----------------------|---------------------------------|------------------------|---------------------------------|-----------------------|
| O-11        | O1                    | Jul. 10, 2017                   | Aug. 28, 2017          | -1.00*                          | 1.46                  |
| O-12        | O1                    | Jul. 10, 2017                   | Aug. 28, 2017          | -0.30*                          | 0.47                  |
| O-13        | O1                    | Jul. 10, 2017                   | Aug. 28, 2017          | 4.10                            | 2.63                  |
| O-14        | O1                    | Jul. 10, 2017                   | Aug. 28, 2017          | 1.30                            | 1.98                  |
| O-15        | O1                    | Jul. 10, 2017                   | Aug. 28, 2017          | -0.70*                          | 1.50                  |
| O-16        | O1                    | Jul. 10, 2017                   | Aug. 28, 2017          | -0.20*                          | -0.79                 |
| O-17        | O1                    | Jul. 10, 2017                   | Aug. 28, 2017          | 0.30                            | 3.34                  |
| O-18        | O1                    | Jul. 10, 2017                   | Aug. 28, 2017          | -0.60*                          | 0.94                  |
| O-19        | O1                    | Jul. 10, 2017                   | Aug. 28, 2017          | -0.50*                          | 2.00                  |
| O-20        | O1                    | Jul. 10, 2017                   | Aug. 28, 2017          | -1.20*                          | 1.39                  |
| G-11        | G1                    | Jul. 10, 2017                   | Aug. 28, 2017          | 1.80                            | 3.82                  |
| G-12        | G1                    | Jul. 10, 2017                   | Aug. 28, 2017          | 10.20                           | 2.18                  |
| G-13        | G1                    | Jul. 10, 2017                   | Aug. 28, 2017          | 1.20                            | 10.32                 |
| G-14        | G2                    | Jul. 10, 2017                   | Aug. 28, 2017          | -1.80*                          | 1.84                  |
| G-15        | G2                    | Jul. 10, 2017                   | Aug. 28, 2017          | 2.40                            | 1.64                  |
| G-16        | G2                    | Jul. 10, 2017                   | Aug. 28, 2017          | 0.90                            | 4.59                  |
| G-17        | G3                    | Jul. 10, 2017                   | Aug. 28, 2017          | 0.60                            | -2.25                 |
| G-18        | G3                    | Jul. 10, 2017                   | Aug. 28, 2017          | 12.90                           | 2.35                  |
| G-19        | G3                    | Jul. 10, 2017                   | Aug. 28, 2017          | 1.90                            | 2.27                  |
| G-20        | G3                    | Jul. 10, 2017                   | Aug. 28, 2017          | 1.80                            | 3.64                  |
| O-21        | O1                    | Aug. 07, 2017                   | Sep. 06, 2017          | 6.00                            | 2.23                  |
| O-22        | O1                    | Aug. 07, 2017                   | Sep. 06, 2017          | 7.80                            | 2.25                  |
| O-23        | O1                    | Aug. 07, 2017                   | Sep. 06, 2017          | 8.40                            | 2.12                  |
| O-24        | O1                    | Aug. 07, 2017                   | Sep. 06, 2017          | 6.60                            | 2.28                  |
| O-25        | O1                    | Aug. 07, 2017                   | Sep. 06, 2017          | 11.80                           | 2.09                  |
| O-26        | O1                    | Aug. 07, 2017                   | Sep. 06, 2017          | 9.80                            | 1.93                  |
| O-27        | O1                    | Aug. 07, 2017                   | Sep. 06, 2017          | 9.00                            | 2.20                  |
| O-28        | O1                    | Aug. 07, 2017                   | Sep. 06, 2017          | 4.00                            | 3.65                  |
| O-29        | O1                    | Aug. 07, 2017                   | Sep. 06, 2017          | 2.10                            | 4.07                  |
| O-20        | O1                    | Aug. 07, 2017                   | Sep. 06, 2017          | 2.90                            | 2.34                  |
| G-21        | G1                    | Aug. 07, 2017                   | Sep. 08, 2017          | 5.40                            | 2.69                  |
| G-22        | G1                    | Aug. 07, 2017                   | Sep. 08, 2017          | 9.20                            | 2.08                  |
| G-23        | G1                    | Aug. 07, 2017                   | Sep. 08, 2017          | 3.90                            | 2.38                  |

|      |    |               |               |        |        |
|------|----|---------------|---------------|--------|--------|
| G-24 | G2 | Aug. 07, 2017 | Sep. 08, 2017 | 4.90   | 2.04   |
| G-25 | G2 | Aug. 07, 2017 | Sep. 08, 2017 | 0.60   | -2.94  |
| G-26 | G2 | Aug. 07, 2017 | Sep. 08, 2017 | 5.40   | 2.33   |
| G-27 | G3 | Aug. 07, 2017 | Sep. 08, 2017 | 7.40   | 2.07   |
| G-28 | G3 | Aug. 07, 2017 | Sep. 08, 2017 | 2.20   | 3.77   |
| G-29 | G3 | Aug. 07, 2017 | Sep. 08, 2017 | 2.70   | 2.86   |
| G-30 | G3 | Aug. 07, 2017 | Sep. 08, 2017 | 2.20   | 10.20  |
| O-31 | O1 | Sep. 11, 2017 | Oct. 17, 2017 | 3.40   | 2.02   |
| O-32 | O1 | Sep. 11, 2017 | Oct. 17, 2017 | 1.40   | -1.84  |
| O-33 | O1 | Sep. 11, 2017 | Oct. 17, 2017 | -0.30* | 0.48   |
| O-34 | O1 | Sep. 11, 2017 | Oct. 17, 2017 | 2.40   | 12.68  |
| O-35 | O1 | Sep. 11, 2017 | Oct. 17, 2017 | 2.30   | 4.93   |
| O-36 | O1 | Sep. 11, 2017 | Oct. 17, 2017 | 6.30   | 2.21   |
| O-37 | O1 | Sep. 11, 2017 | Oct. 17, 2017 | 4.00   | 2.33   |
| O-38 | O1 | Sep. 11, 2017 | Oct. 17, 2017 | 1.70   | -16.95 |
| O-39 | O1 | Sep. 11, 2017 | Oct. 17, 2017 | 1.70   | -2.21  |
| O-40 | O1 | Sep. 11, 2017 | Oct. 17, 2017 | 1.80   | -1.98  |
| G-31 | G1 | Sep. 11, 2017 | Oct. 17, 2017 | 0.40   | -0.37  |
| G-32 | G1 | Sep. 11, 2017 | Oct. 17, 2017 | 3.80   | 3.88   |
| G-33 | G1 | Sep. 11, 2017 | Oct. 17, 2017 | 0.60   | -0.89  |
| G-34 | G2 | Sep. 11, 2017 | Oct. 17, 2017 | 4.20   | 4.03   |
| G-35 | G2 | Sep. 11, 2017 | Oct. 17, 2017 | 0.50   | -0.39  |
| G-36 | G2 | Sep. 11, 2017 | Oct. 17, 2017 | 1.20   | -1.08  |
| G-37 | G3 | Sep. 11, 2017 | Oct. 17, 2017 | 3.20   | 3.56   |
| G-38 | G3 | Sep. 11, 2017 | Oct. 17, 2017 | -0.30* | 0.27   |
| G-39 | G3 | Sep. 11, 2017 | Oct. 17, 2017 | 3.60   | 2.80   |
| G-40 | G3 | Sep. 11, 2017 | Oct. 17, 2017 | -0.30* | 0.30   |
| O-41 | O1 | Oct. 16, 2017 | Oct. 23, 2017 | 2.40   | 3.83   |
| O-42 | O1 | Oct. 16, 2017 | Oct. 23, 2017 | 0.50   | -1.31  |
| O-43 | O1 | Oct. 16, 2017 | Oct. 23, 2017 | 0.20   | -0.14  |
| O-44 | O1 | Oct. 16, 2017 | Oct. 23, 2017 | 0.00   | -0.04  |
| O-45 | O1 | Oct. 16, 2017 | Oct. 23, 2017 | 3.30   | 3.30   |
| O-46 | O1 | Oct. 16, 2017 | Oct. 23, 2017 | 13.10  | 2.00   |
| O-47 | O1 | Oct. 16, 2017 | Oct. 23, 2017 | 1.60   | 39.14  |
| O-48 | O1 | Oct. 16, 2017 | Oct. 23, 2017 | 0.80   | -2.45  |
| O-49 | O1 | Oct. 16, 2017 | Oct. 23, 2017 | 5.40   | 2.20   |
| O-50 | O1 | Oct. 16, 2017 | Oct. 23, 2017 | 1.90   | 2.95   |
| G-41 | G1 | Oct. 16, 2017 | Oct. 23, 2017 | 2.10   | 6.15   |
| G-42 | G1 | Oct. 16, 2017 | Oct. 23, 2017 | 15.40  | 2.08   |
| G-43 | G1 | Oct. 16, 2017 | Oct. 23, 2017 | 2.00   | -10.66 |
| G-44 | G2 | Oct. 16, 2017 | Oct. 23, 2017 | 9.00   | 2.77   |
| G-45 | G2 | Oct. 16, 2017 | Oct. 23, 2017 | 1.30   | 3.72   |
| G-46 | G2 | Oct. 16, 2017 | Oct. 23, 2017 | 5.80   | 2.38   |
| G-47 | G3 | Oct. 16, 2017 | Oct. 23, 2017 | 8.50   | 2.35   |
| G-48 | G3 | Oct. 16, 2017 | Oct. 23, 2017 | 3.40   | 2.86   |
| G-49 | G3 | Oct. 16, 2017 | Oct. 23, 2017 | 18.60  | 2.17   |
| G-50 | G3 | Oct. 16, 2017 | Oct. 23, 2017 | 7.60   | 2.93   |

\* DNA concentration was below the lower limit of quantification (NanoDrop 2000c Spectrophotometer, Thermo Fisher Scientific, Waltham, MA, USA)

<sup>a</sup> Details regarding locations of the sampling sites are given in Fig. 1.

**Supplementary Table S2.** Environmental parameters at the time of sampling in each sampling site.

|                        | G11-20 <sup>a</sup> | G21-30 <sup>a</sup> | G31-40 <sup>a</sup> | G41-50 <sup>a</sup> | O11-20 | O21-30 | O31-40 | O41-50 |
|------------------------|---------------------|---------------------|---------------------|---------------------|--------|--------|--------|--------|
| Temperature (°C)       | 31.9                | 31.6                | 32.2                | 33                  | 36.9   | 29.2   | 32.1   | 36     |
| Humidity (%)           | 74.2                | 61.3                | 72                  | 77.1                | 60.5   | 56.7   | 69     | 63.4   |
| Water temperature (°C) | 27.1                | 26.9                | 28.7                | 25.3                | 27.5   | 27.2   | 28.5   | 26.4   |
| Weather <sup>b</sup>   | 1                   | 0                   | 1                   | 0                   | 1      | 0      | 1      | 1      |

<sup>a</sup> Location G (Genka River) series presents average scores for the 3 sampling sites.

<sup>b</sup> Weather: 1, sunny; 0, cloudy; -1, rainy.

**Supplementary Table S3.** Pearson's correlation coefficients between *Leptospira* and vertebrate eDNA detection (read numbers) or rainfall amount (mm).

|                                    | KP60 <sup>a</sup> |                  | PS50 <sup>b</sup> |                  |
|------------------------------------|-------------------|------------------|-------------------|------------------|
|                                    | <i>Lipl32</i>     | <i>Lepto-16S</i> | <i>Lipl32</i>     | <i>Lepto-16S</i> |
| Rainfall_1day                      | 0.8692            | 0.8283           | 0.8692            | 0.8283           |
| Rainfall_3day                      | 0.7488            | 0.8186           | 0.7488            | 0.8186           |
| <i>Lipl32</i>                      | 1.0000            | 0.8946           | 1.0000            | 0.8946           |
| <i>Lepto-16S</i>                   | 0.8946            | 1.0000           | 0.8946            | 1.0000           |
| <i>Acanthopagrus sivicolus</i>     | 0.0000            | 0.0000           | -0.2228           | 0.0221           |
| <i>Acanthurus dussumieri</i>       | 0.0000            | 0.0000           | -0.2909           | -0.3166          |
| <i>Anguilla japonica</i>           | 0.7013            | 0.6661           | -0.2075           | -0.2309          |
| <i>Anguilla luzonensis</i>         | -0.2909           | -0.3166          | 0.9444            | 0.9153           |
| <i>Anguilla marmorata</i>          | 0.3716            | 0.1635           | 0.6260            | 0.4545           |
| <i>Apogon doryssa</i>              | -0.2541           | -0.2858          | -0.2909           | -0.3166          |
| <i>Awaous melanocephalus</i>       | -0.3021           | 0.0045           | -0.3621           | -0.1063          |
| <i>Bothus pantherinus</i>          | -0.2541           | -0.2858          | 0.0000            | 0.0000           |
| <i>Canis lupus familiaris</i>      | -0.3723           | -0.4142          | -0.2228           | 0.0221           |
| <i>Canthigaster amboinensis</i>    | -0.0593           | -0.2242          | 0.0000            | 0.0000           |
| <i>Caragobius urolepis</i>         | 0.1313            | -0.1319          | 0.0000            | 0.0000           |
| <i>Caranx sexfasciatus</i>         | -0.2228           | 0.0221           | -0.2306           | -0.1041          |
| <i>Carassius auratus auratus</i>   | 0.1750            | 0.0740           | -0.2572           | -0.4643          |
| <i>Casmerodius albus</i>           | -0.2228           | 0.0221           | -0.2228           | 0.0221           |
| <i>Chaetodon vagabundus</i>        | 0.0000            | 0.0000           | -0.2713           | -0.2865          |
| <i>Chelon macrolepis</i>           | -0.2689           | -0.3020          | 0.0837            | 0.0269           |
| <i>Choerodon schoenleinii</i>      | 0.0000            | 0.0000           | -0.1097           | 0.1761           |
| <i>Chrysiptera glauca</i>          | -0.2228           | 0.0221           | 0.0000            | 0.0000           |
| <i>Columba janthina janthina</i>   | 0.0000            | 0.0000           | -0.1390           | -0.1549          |
| <i>Corvus splendens</i>            | 0.0000            | 0.0000           | 0.5694            | 0.5799           |
| <i>Cynops ensicauda</i>            | 0.3520            | 0.3222           | 0.9444            | 0.9153           |
| <i>Cyprinus carpio</i>             | 0.0753            | 0.1399           | -0.2528           | -0.2831          |
| <i>Egretta garzetta</i>            | 0.0000            | 0.0000           | -0.2228           | 0.0221           |
| <i>Eleotris fusca</i>              | -0.3247           | -0.0104          | -0.4313           | -0.2526          |
| <i>Gambusia affinis</i>            | 0.1313            | -0.1319          | -0.2909           | -0.3166          |
| <i>Glossogobius celebius</i>       | -0.1097           | 0.1761           | 0.0000            | 0.0000           |
| <i>Herpestes javanicus</i>         | 0.0000            | 0.0000           | -0.1390           | -0.1549          |
| <i>Homo sapiens</i>                | -0.1170           | -0.1276          | 0.1128            | 0.0451           |
| <i>Hypsipetes amaurotis</i>        | 0.0000            | 0.0000           | -0.1390           | -0.1549          |
| <i>Kuhlia marginata</i>            | -0.3825           | -0.0004          | -0.4756           | -0.2436          |
| <i>Kuhlia rupestris</i>            | -0.4076           | -0.0457          | -0.3729           | -0.2478          |
| <i>Misgurnus anguillicaudatus</i>  | 0.0000            | 0.0000           | 0.9444            | 0.9153           |
| <i>Monopterus albus</i>            | 0.0000            | 0.0000           | 0.7311            | 0.4047           |
| <i>Mugil cephalus</i>              | -0.4303           | -0.1144          | -0.2761           | -0.1758          |
| <i>Mulloidichthys vanicolensis</i> | -0.2909           | -0.3166          | 0.0000            | 0.0000           |
| <i>Mus musculus domesticus</i>     | -0.2080           | -0.2644          | -0.2541           | -0.2858          |
| <i>Nematalosa come</i>             | -0.2541           | -0.2858          | 0.0000            | 0.0000           |
| <i>Neoniphon sammara</i>           | 0.0000            | 0.0000           | -0.2909           | -0.3166          |



|                                      |         |         |         |         |
|--------------------------------------|---------|---------|---------|---------|
| <i>Oncorhynchus mykiss</i>           | 0.1313  | -0.1319 | 0.0000  | 0.0000  |
| <i>Oncorhynchus nerka</i>            | 0.1313  | -0.1319 | 0.0000  | 0.0000  |
| <i>Ophieleotris sp. Tametomohaze</i> | -0.1390 | -0.1549 | 0.0000  | 0.0000  |
| <i>Oreochromis aureus</i>            | 0.0000  | 0.0000  | -0.2541 | -0.2858 |
| <i>Oreochromis niloticus</i>         | 0.1392  | -0.1047 | -0.2700 | -0.2968 |
| <i>Oreochromis sp. red tilapia</i>   | -0.2046 | -0.3288 | 0.0000  | 0.0000  |
| <i>Ostorhinchus cookii</i>           | 0.0000  | 0.0000  | -0.2541 | -0.2858 |
| <i>Ostorhinchus doederleini</i>      | -0.2541 | -0.2858 | 0.0000  | 0.0000  |
| <i>Ostracion immaculatus</i>         | 0.0000  | 0.0000  | -0.2909 | -0.3166 |
| <i>Parupeneus ciliatus</i>           | 0.0000  | 0.0000  | 0.1313  | -0.1319 |
| <i>Pelodiscus sinensis</i>           | -0.1743 | 0.0840  | -0.2463 | -0.2457 |
| <i>Pempheris xanthoptera</i>         | -0.2541 | -0.2858 | -0.2541 | -0.2858 |
| <i>Plecoglossus altivelis</i>        | -0.1390 | -0.1549 | -0.1390 | -0.1549 |
| <i>Poecilia reticulata</i>           | -0.3009 | 0.0467  | -0.2977 | -0.0101 |
| <i>Pteropus dasymallus</i>           | -0.1390 | -0.1549 | 0.8615  | 0.8937  |
| <i>Pterygoplichthys disjunctivus</i> | 0.0000  | 0.0000  | 0.9444  | 0.9153  |
| <i>Rastrelliger kanagurta</i>        | -0.2909 | -0.3166 | 0.0000  | 0.0000  |
| <i>Rattus tanezumi</i>               | -0.2228 | 0.0221  | -0.3301 | -0.2741 |
| <i>Redigobius bikolanus</i>          | -0.2228 | 0.0221  | -0.2228 | 0.0221  |
| <i>Rhinogobius brunneus Okinawa</i>  | -0.3602 | -0.0136 | -0.1174 | -0.0468 |
| <i>Rhinogobius giurinus</i>          | -0.3511 | 0.0379  | -0.3496 | -0.1751 |
| <i>Rhinogobius sp CBM-ZF12303</i>    | -0.3451 | 0.0105  | -0.3055 | -0.2128 |
| <i>Rhyacichthys aspro</i>            | -0.1390 | -0.1549 | 0.0000  | 0.0000  |
| <i>Sargocentron ittodai</i>          | 0.0000  | 0.0000  | -0.2909 | -0.3166 |
| <i>Scatophagus argus</i>             | 0.0000  | 0.0000  | -0.0340 | -0.2879 |
| <i>Schismatogobius roxasi</i>        | -0.1097 | 0.1761  | -0.1097 | 0.1761  |
| <i>Sicyopterus japonicus</i>         | -0.1797 | -0.1443 | -0.1485 | -0.1495 |
| <i>Sicyopterus lagocephalus</i>      | -0.1389 | -0.1541 | -0.1384 | -0.1538 |
| <i>Siganus guttatus</i>              | -0.2541 | -0.2858 | 0.1313  | -0.1319 |
| <i>Stenogobius sp. Tanekawahaze</i>  | -0.2358 | 0.1676  | -0.2228 | 0.0221  |
| <i>Stiphodon alcedo</i>              | 0.0000  | 0.0000  | -0.2228 | 0.0221  |
| <i>Stiphodon percnopterygionus</i>   | -0.2863 | 0.1154  | -0.3560 | -0.1652 |
| <i>Sus scrofa breed type I Lanyu</i> | 0.9444  | 0.9153  | 0.9444  | 0.9153  |
| <i>Trachurus japonicus</i>           | 0.0000  | 0.0000  | -0.2909 | -0.3166 |
| <i>Tridentiger kuroiwae</i>          | -0.1723 | 0.1436  | 0.2161  | 0.2733  |
| <i>Zosterops erythropleurus</i>      | 0.0000  | 0.0000  | -0.2228 | 0.0221  |

<sup>a</sup> KP60 denotes results from PCR amplification using KAPA HiFi HotStart ReadyMix kit (KAPA Biosystems, Wilmington, MA, USA) at an annealing temperature of 60 °C.

<sup>b</sup> PS50 denotes results from the PCR using PrimeSTAR HS DNA polymerase (Takara, Shiga, Japan) at an annealing temperature of 50 °C.

## Supplementary Figures

**Supplementary Figure S1. Photos of river water sampling at Genka and Okuma Rivers in October 2017.**

**Supplementary Figure S2. Molecular phylogenetic tree for leptospiral 16S rRNA genes.** In total 282 nucleotide sites from environmental DNA sequences determined by the present study (shown in gray shading) were aligned and analyzed with known reference sequences of representative species of *Leptospira* (GenBank accession numbers are shown within sequence names).

**Supplementary Figure S3. Environmental detection of *Leptospira lipL32* gene.** The numbers of sequence reads detected in each sample are shown as colored matrices in orange shading. Orange bars indicate the total number of *lipL32* reads per sample summed across *Leptospira* species. Blue bars indicate the amount of rainfall (mm) on the sampling day (left column) and that including the 2 days before sampling, the day of sampling, and the day afterward (right column). O1, G1, G2, and G3 indicate sampling locations Okuma-1 and Genka-1, -2, and -3, respectively. G-11–G-50 and O-11–O-50 denote sample names.

**Supplementary Figure S4. Molecular phylogenetic tree for *Leptospira lipL32* gene.** In total 158 nucleotide sites from environmental DNA sequences determined by the present study (shown in gray shading; primary Blast-based species annotations are described with sequence names) were aligned and analyzed with known reference sequences of representative pathogenic species of *Leptospira* (GenBank accession numbers are shown with sequence names).

**Supplementary Figure S5. Heatmap representation of relative sequence read counts of bacterial species detected by metabarcoding analysis of 16S rRNA gene V4 region.** Columns indicate detected bacterial species, and rows indicate river water samples; O1, G1, G2, and G3 denote sampling locations Okuma-1 and Genka-1, -2, and -3, respectively. G-11–G-50 and O-11–O-50 indicate sample names. Pink-colored matrices indicate the relative sequence read counts standardized to the logarithm of

counts per million (cpm) reads within each sample.

**Supplementary Figure S6. Bacteriome profiles and their temporal changes in**

**Genka and Okuma Rivers.** Ordinations of two-dimensional nonmetric multidimensional scaling of the standardized profiles of bacteriomes were estimated by using the 16S rRNA gene V4 region data for each sample. G-11–G-50 and O-11–O-50 indicate sample names. Horizontal and vertical axes correspond to the estimated two-dimensional coordinate 1 and 2 where ranked differences in similarity scores based on Pearson's correlation coefficients ( $r$ ) were preserved. A normalized stress value of this plot was 0.207, and the determination factor  $R^2$  values of coordinate 1 and 2 were 0.579 and 0.203, respectively.

**Supplementary Figure S7. Heatmap representation of relative sequence read counts of vertebrate species detected by metabarcoding analysis of the**

**mitochondrial 12S rRNA gene.** Columns indicate detected species, and rows indicate river water samples; O1, G1, G2, and G3 denote the sampling locations Okuma-1 and Genka-1, -2, and -3, respectively. G-11–G-50 and O-11–O-50 indicate sample names. Pink-colored matrices indicate relative sequence read counts standardized to logarithm of counts per million (cpm) reads within each sample.

**Supplementary Figure S8. Correlation coefficients between the 18 bacteria species correlated with *Leptospira* detection and 74 vertebrates detected in this study.**

Columns denote the numbers of operational taxonomic units (OTUs) of the bacterial species shown in Fig. 4C. Gray shading indicates OTUs that were significantly correlated with leptospiral 16S rRNA gene detection ( $P < 0.05$ ), and asterisks show that their partial correlation corrected for rainfall was significant ( $P < 0.05$ ). Rows denote vertebrate species. Pink-colored matrices indicate positive correlation, whereas blue shading indicates negative correlation. Yellow shading denotes the 10 vertebrate species that were highly correlated with *Leptospira* detection (indicated by the black bar in Fig. 5).

**Supplementary Figure S9. Partial correlation coefficients between 18 bacteria species and 74 vertebrates after correction for *Leptospira* detection.** Columns denote

the numbers of operational taxonomic unit (OTUs) of the bacterial species highlighted in Fig. 4C. Gray shading indicates OTUs that were significantly correlated with leptospiral 16S rRNA gene detection ( $P < 0.05$ ), and asterisks show that their partial correlation after correction for rainfall remained significant ( $P < 0.05$ ). Rows denote vertebrate species. Matrices colored in pink indicate positive correlations, whereas blue shading shows negative correlations. Yellow shading denotes the 10 vertebrate species that were highly correlated with *Leptospira* detection (indicated by the black bar in Fig. 5).

**Supplementary Figure S10. Statistical significance of the partial correlation coefficients between 18 bacteria species and 74 vertebrates after correction for *Leptospira* detection.** Columns denote the numbers of operational taxonomic units (OTUs) of the bacterial species highlighted in Fig. 4C. Gray shading indicates OTUs that were significantly correlated with leptospiral 16S rRNA gene detection ( $P < 0.05$ ), and asterisks show that their partial correlation after correction for rainfall remained significant ( $P < 0.05$ ). Rows denote vertebrate species. Green shading indicates the level of statistical significance, and yellow shading denotes the 10 vertebrate species that were highly correlated with *Leptospira* detection (indicated by the black bar in Fig. 5).

**Supplementary Figure S11. Preliminary experiment for collections of leptospiral cells by Whatman glass-fiber filters.** (A) Bottles of the cultured *Leptospira interrogans* diluted to concentrations of  $10^3$ ,  $10^4$ ,  $10^5$ ,  $10^6$ , and  $4 \times 10^6$  cells per milliliter by ultrapure water obtained by a Milli-Q Water System (Millipore Corporation, Bedford, MA). Five liters of these solutions were vacuum-filtered through by Whatman glass-fiber filter (pore size,  $0.7 \mu\text{m}$ ; diameter, 47 mm; Little Chalfont, Buckinghamshire, United Kingdom). Half of the filters was respectively subjected to the DNA extraction by using DNeasy Blood and Tissue Kit or PowerSoil Kit (Qiagen, Hilden, Germany). By the former kit, 0.172, 0.257, 2.850, 17.00, and 64.20 ng/ $\mu\text{L}$  of total DNA was extracted from the five bottles of the above order, respectively. By the latter kit, 0.053, 0.000, 0.235, 0.843, and 0.336 ng/ $\mu\text{L}$  of DNA were obtained, respectively. (B) PCR amplification of bacterial 16S rRNA V4 region. Ten DNA samples obtained above were subjected to PCR experiments and sequencing by Illumina

MiSeq platform (Illumina, San Diego, CA, USA) according to the method described in Sato *et al.* (2015)<sup>1</sup>. Nega denotes negative control sample (ultrapure water) and M denotes 100 bp DNA Ladder H3 RTU (Nippon Genetics, Toyama, Japan). Target sequences (378 bp) were successfully amplified. (C) A typical sequence accounts for the majority of DNA sequences obtained from the above samples. We confirmed that  $\geq 97.0\%$  of these sequences were from *L. interrogans* based on the nucleotide Blast analysis (<https://blast.ncbi.nlm.nih.gov/Blast.cgi>). A few percent of them were estimated to be derived from bacteria in tap water according to the same analysis.

## References

[1] Sato, Y. *et al.* Inter-individual differences in the oral bacteriome are greater than intra-day fluctuations in individuals. *PLoS One* **10**, e0131607 (2015).

Genka River (G-46) sampling

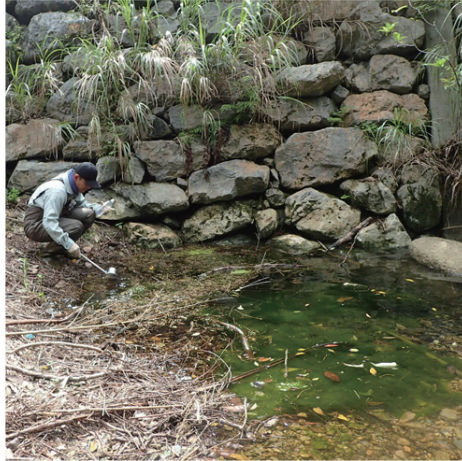

Genka River (G-50) sampling

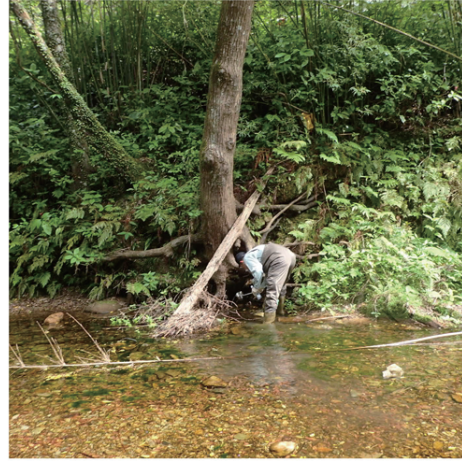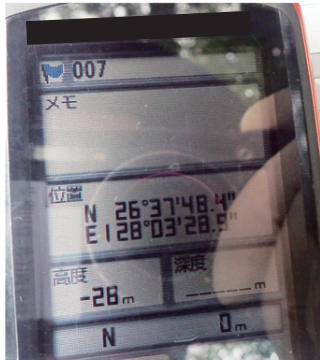

Genka River G41 GPS

Okuma River (O-45) sampling

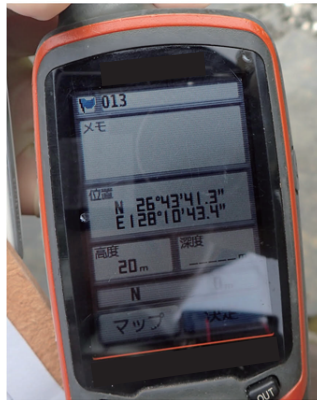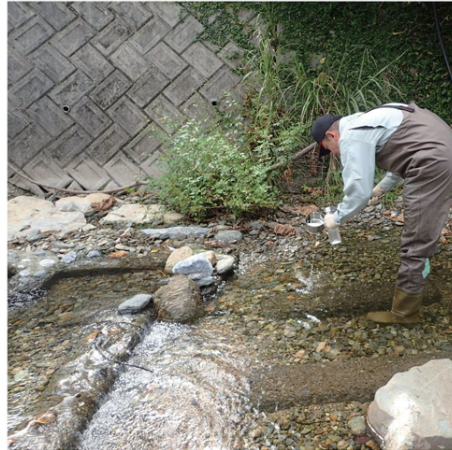

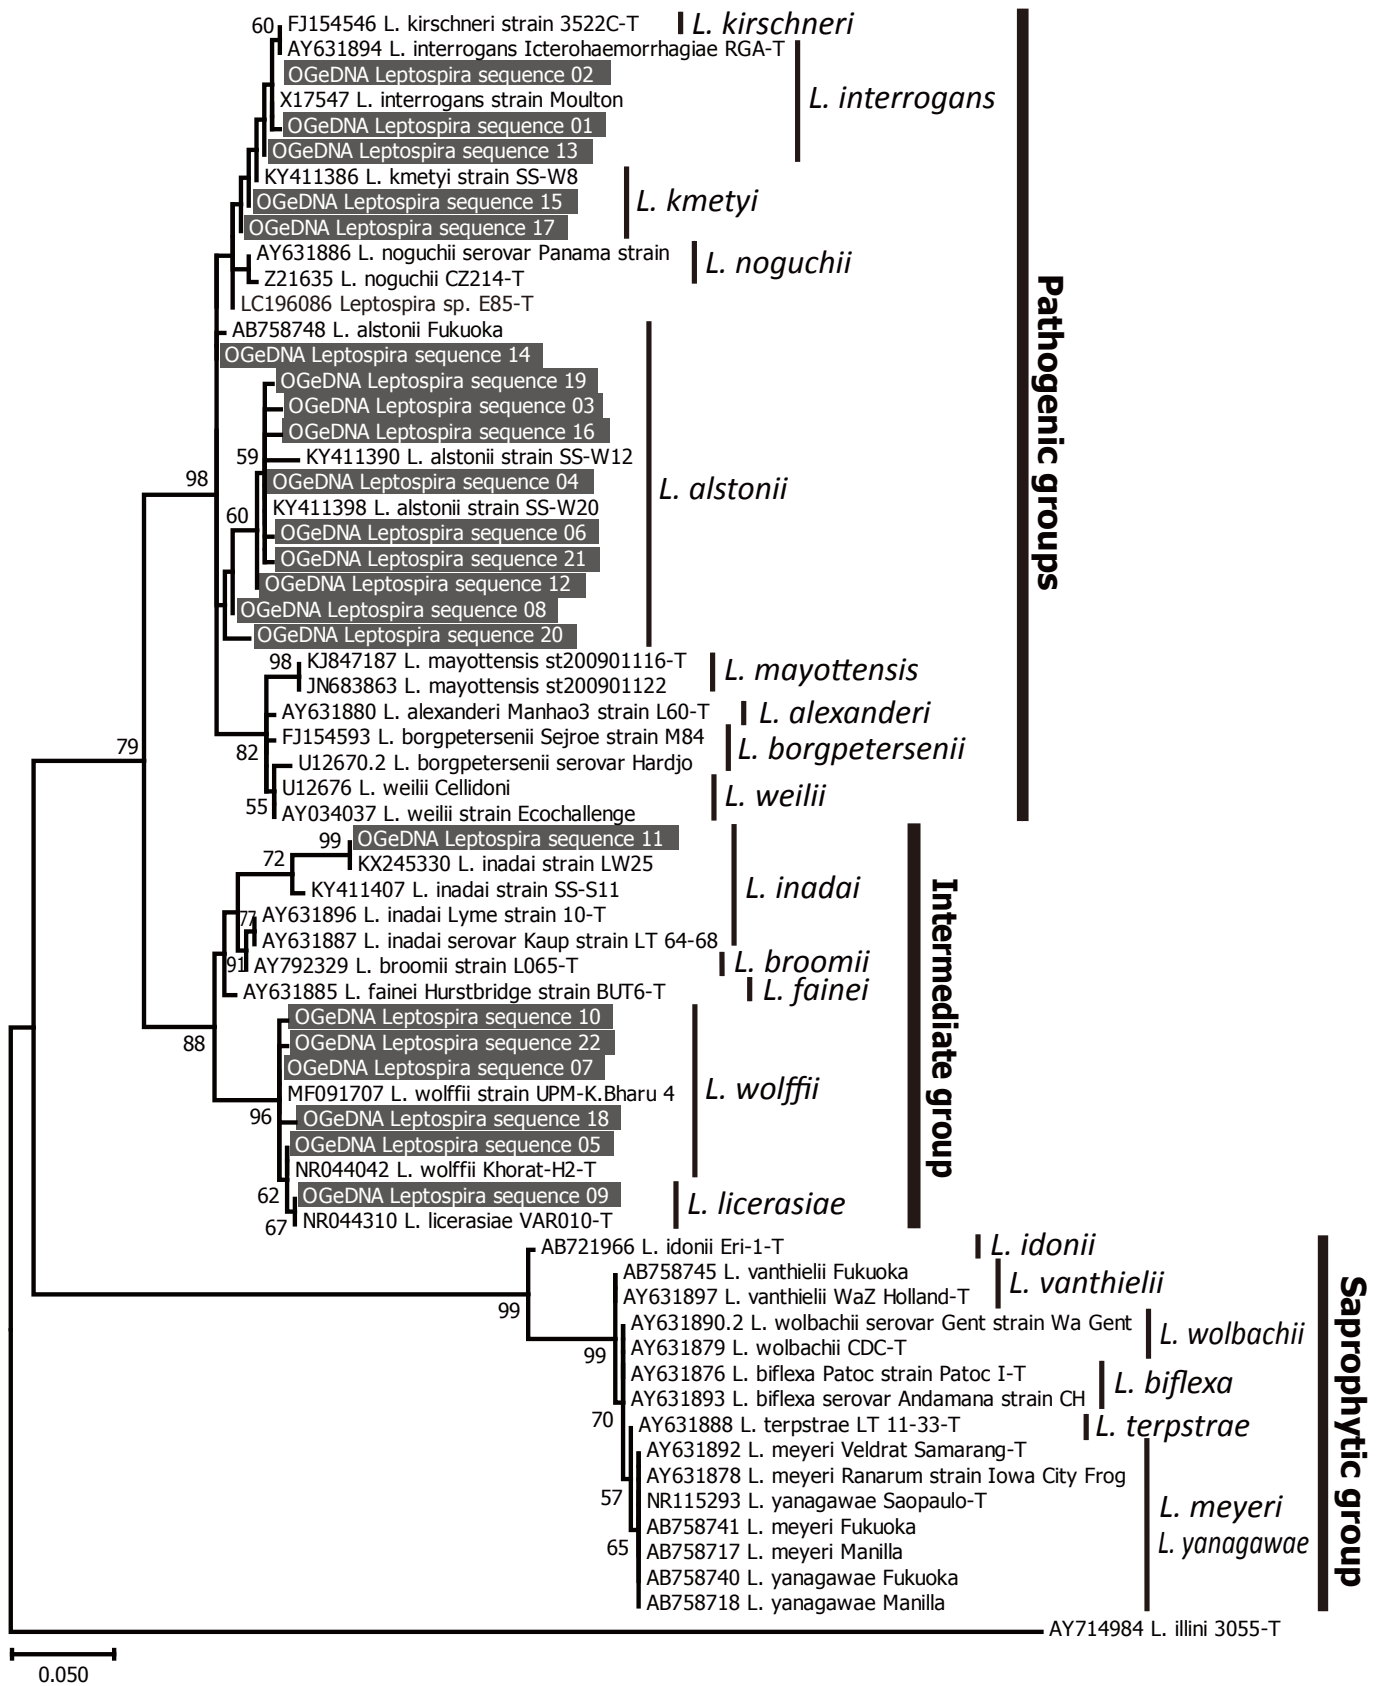

Supplementary Figure S2

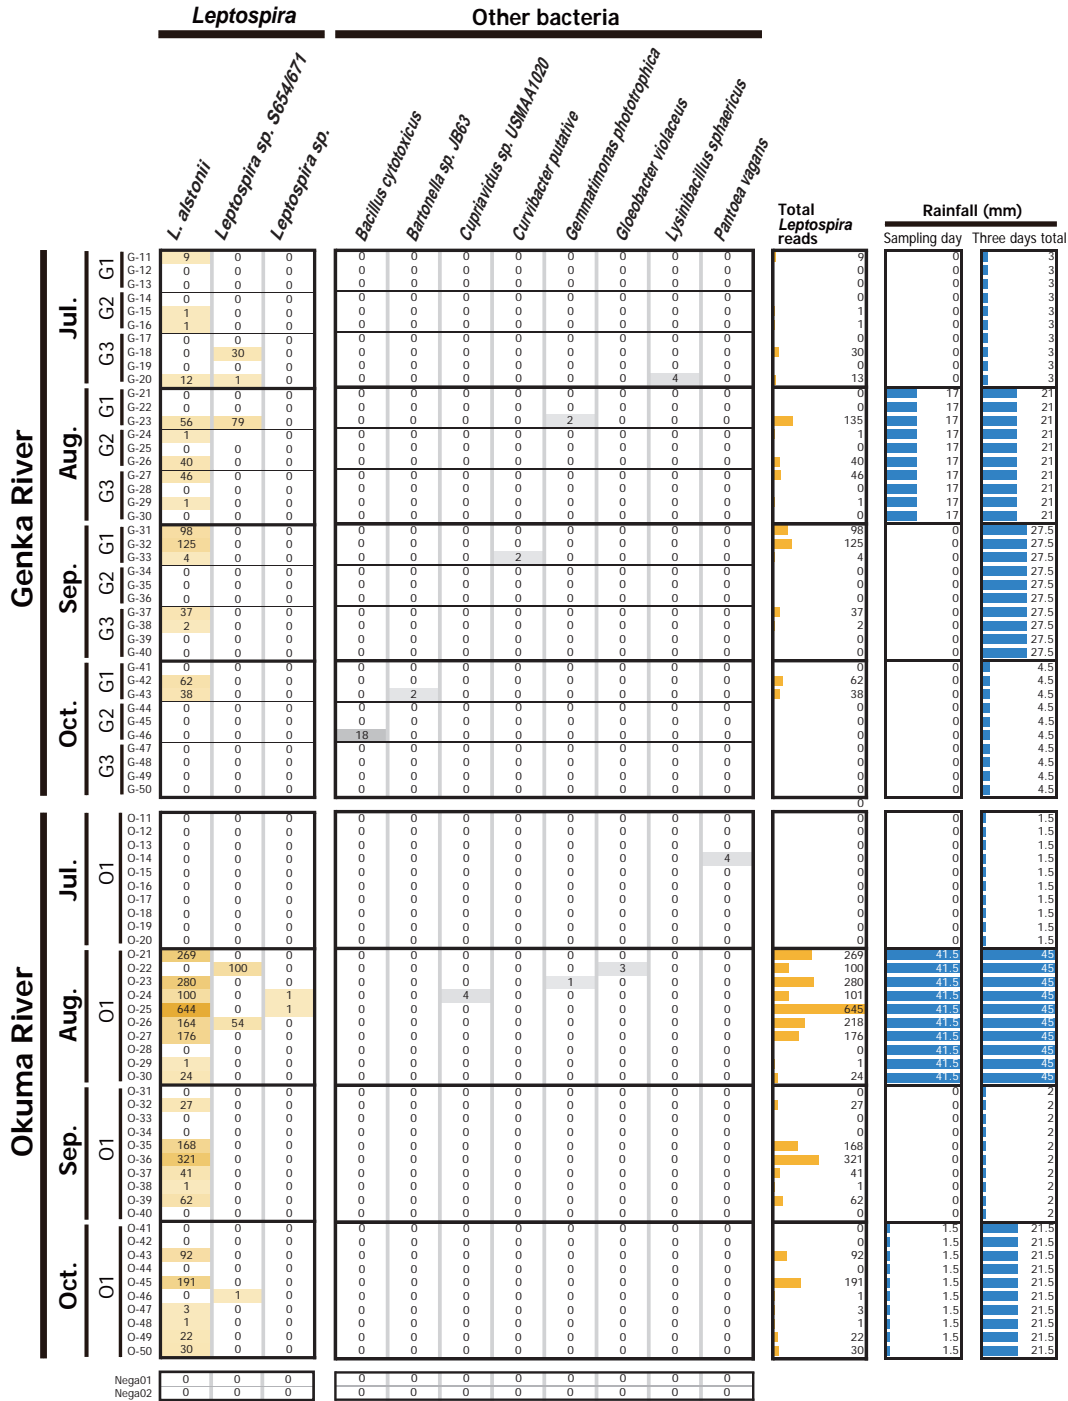

Supplementary Figure S3





Okuma River

Genka River

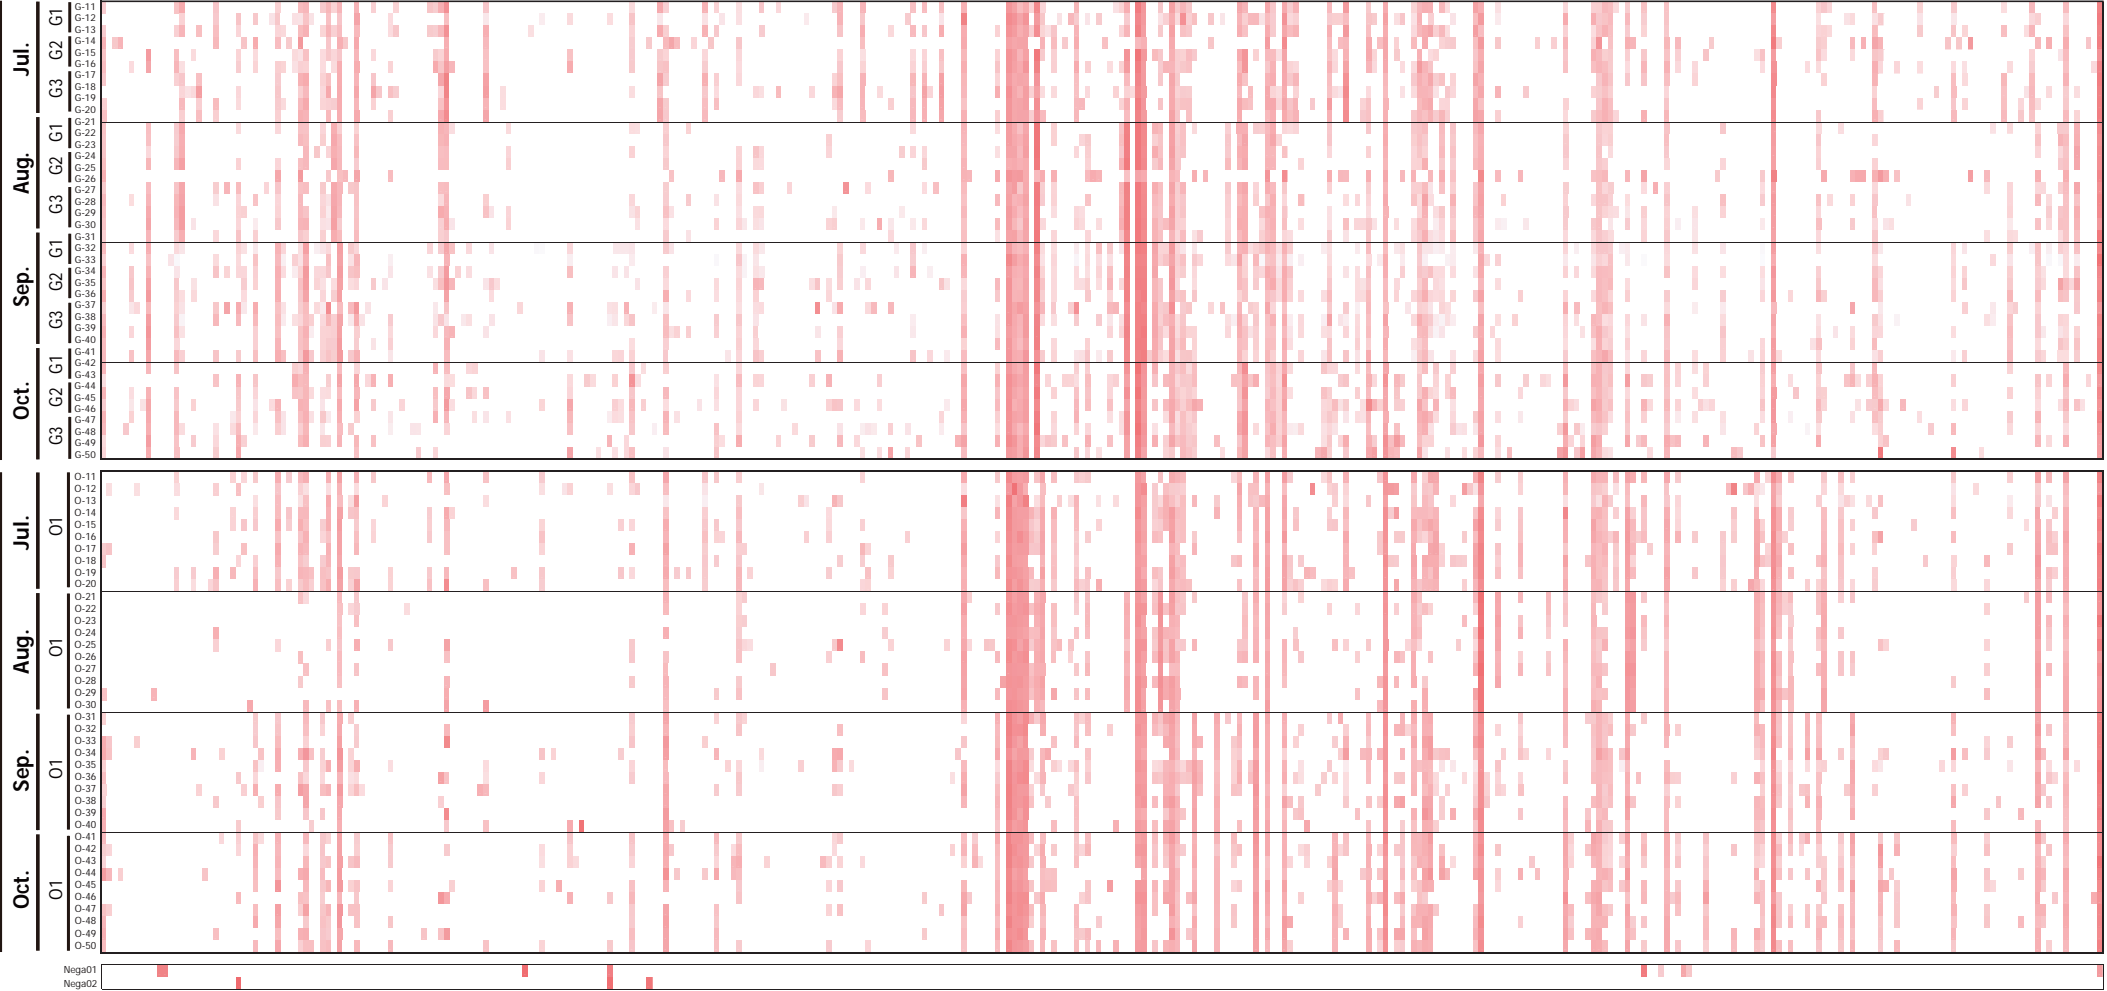

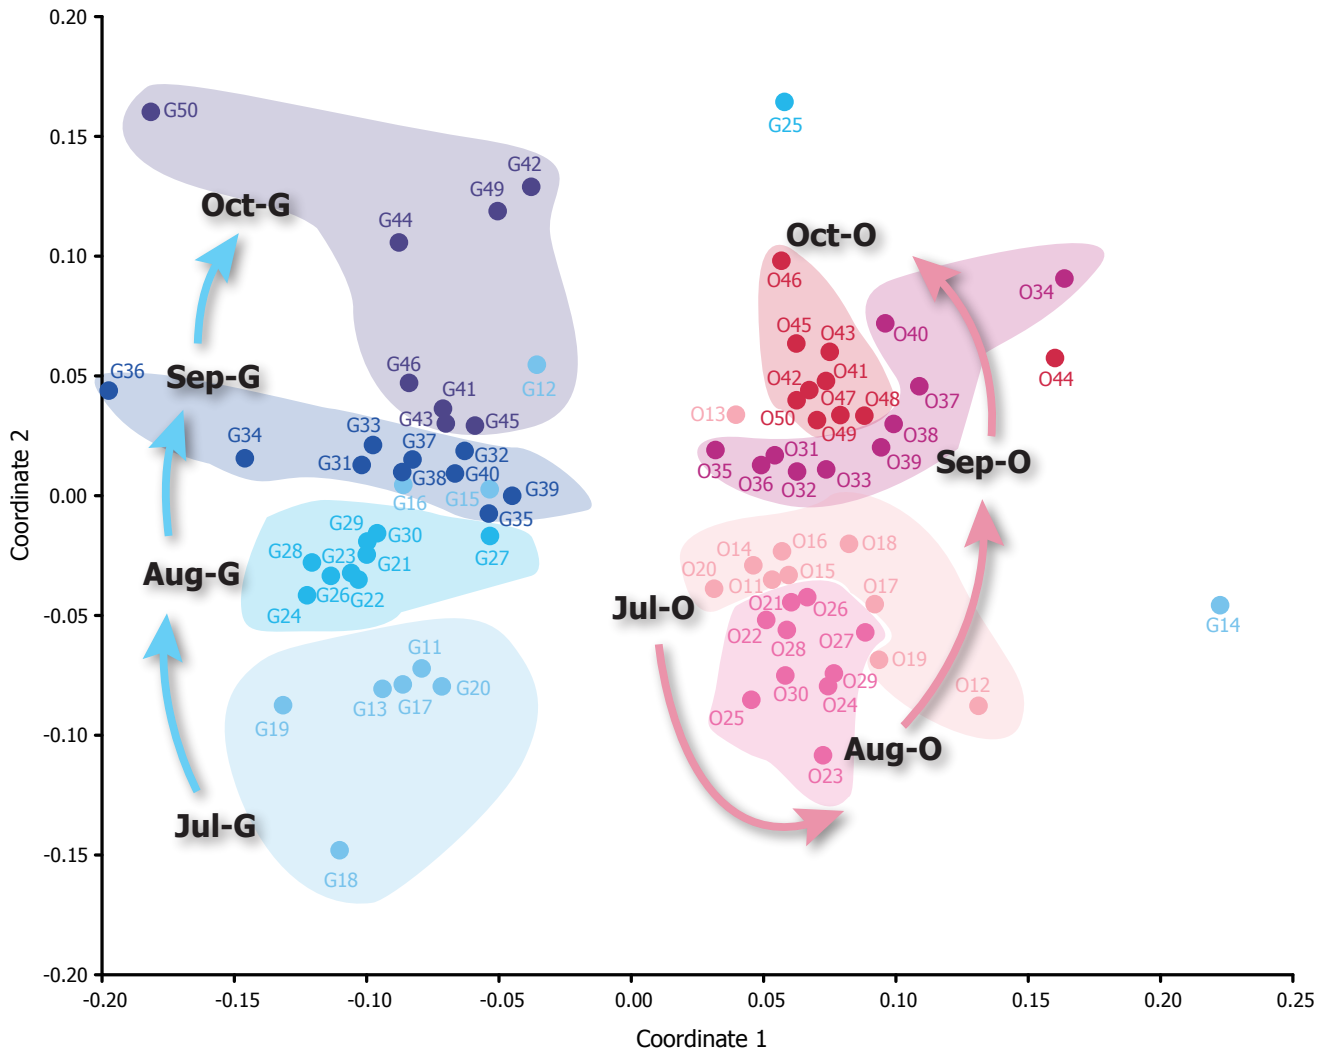

Supplementary Figure S6

### Genka River

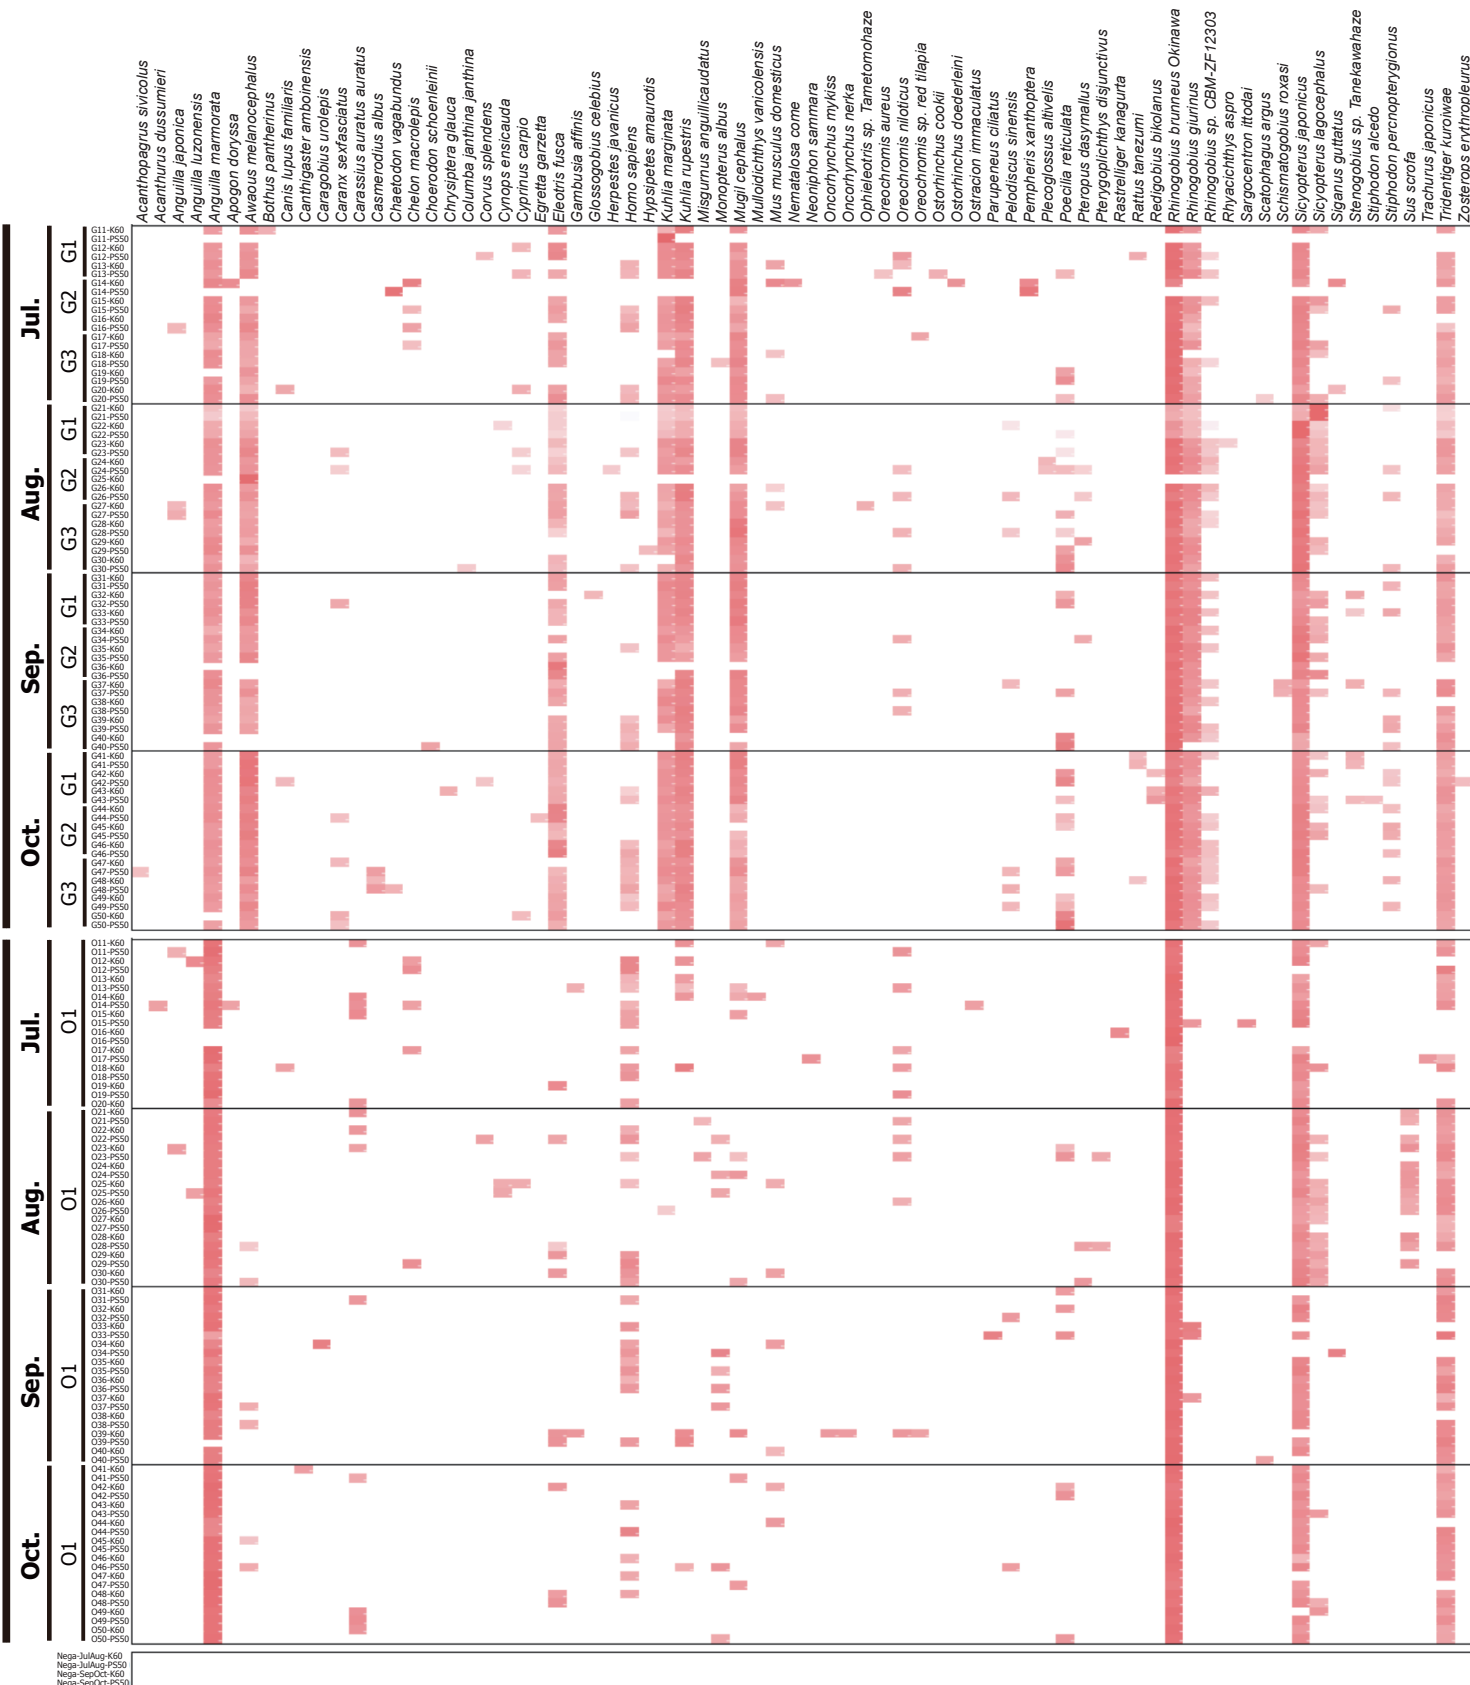

### Okuma River



|                                     | otu_3017 | otu_314  | otu_1059 | otu_1286 | otu_2514 | otu_2802 | otu_2895 | otu_2898 | otu_2912 | otu_3275 | otu_3524 | otu_3716 | otu_3253 | otu_2885 | otu_3246 | otu_3802 | otu_2466 | otu_2871 |
|-------------------------------------|----------|----------|----------|----------|----------|----------|----------|----------|----------|----------|----------|----------|----------|----------|----------|----------|----------|----------|
| <i>Acanthopagrus sivicolus</i>      | -0.16460 | -0.09759 | -0.09759 | -0.09759 | -0.09759 | -0.09759 | -0.09759 | -0.09759 | -0.09759 | -0.04755 | -0.12458 | -0.12765 | -0.11636 | -0.19436 | -0.17185 | -0.15237 | -0.25136 | 0.07972  |
| <i>Acanthurus dussumieri</i>        | -0.09715 | -0.09759 | -0.09759 | -0.09759 | -0.09759 | -0.09759 | -0.09759 | -0.09759 | -0.09759 | -0.11496 | 0.01071  | 0.11622  | -0.08228 | -0.19436 | 0.08573  | 0.20993  | 0.01364  | -0.18011 |
| <i>Anguilla japonica</i>            | 0.12684  | 0.02310  | 0.02310  | 0.02310  | 0.02310  | 0.02310  | 0.02310  | 0.02310  | 0.02310  | -0.00242 | -0.00123 | -0.00442 | -0.06104 | 0.47459  | -0.06423 | -0.02639 | 0.11040  | -0.18658 |
| <i>Anguilla luzonensis</i>          | 0.45592  | 0.46803  | 0.46803  | 0.46803  | 0.46803  | 0.46803  | 0.46803  | 0.46803  | 0.46803  | 0.45342  | 0.53434  | 0.58675  | 0.46870  | 0.20263  | 0.55992  | 0.61618  | 0.43433  | -0.10651 |
| <i>Anguilla marmorata</i>           | 0.45157  | 0.51672  | 0.51672  | 0.51672  | 0.51672  | 0.51672  | 0.51672  | 0.51672  | 0.51672  | 0.49567  | 0.52838  | 0.51982  | 0.41063  | 0.70503  | 0.55336  | 0.54860  | 0.25063  | -0.19413 |
| <i>Apogon dorsa</i>                 | -0.09737 | -0.10629 | -0.10629 | -0.10629 | -0.10629 | -0.10629 | -0.10629 | -0.10629 | -0.10629 | -0.12521 | -0.10040 | -0.11778 | -0.02451 | -0.21169 | -0.17158 | -0.05748 | -0.25068 | -0.19617 |
| <i>Awaous melanocephalus</i>        | -0.26280 | -0.24496 | -0.24496 | -0.24496 | -0.24496 | -0.24496 | -0.24496 | -0.24496 | -0.24496 | -0.19164 | -0.30835 | -0.32059 | -0.29144 | -0.14938 | -0.42221 | -0.37619 | -0.34300 | -0.11053 |
| <i>Bothus pantherinus</i>           | -0.08872 | -0.09759 | -0.09759 | -0.09759 | -0.09759 | -0.09759 | -0.09759 | -0.09759 | -0.09759 | -0.11496 | -0.10113 | -0.12765 | -0.01731 | -0.19436 | -0.17869 | -0.07562 | -0.25136 | -0.18011 |
| <i>Canis lupus familiaris</i>       | -0.21080 | -0.17211 | -0.17211 | -0.17211 | -0.17211 | -0.17211 | -0.17211 | -0.17211 | -0.17211 | -0.15702 | -0.15633 | -0.14241 | -0.11975 | -0.34278 | -0.22082 | -0.08858 | -0.35343 | -0.14140 |
| <i>Canthigaster amboinensis</i>     | -0.16460 | -0.09759 | -0.09759 | -0.09759 | -0.09759 | -0.09759 | -0.09759 | -0.09759 | -0.09759 | -0.11496 | -0.10744 | -0.12765 | -0.15044 | 0.18978  | -0.06733 | -0.08013 | -0.25136 | -0.18011 |
| <i>Caragobius urolepis</i>          | -0.12744 | -0.09759 | -0.09759 | -0.09759 | -0.09759 | -0.09759 | -0.09759 | -0.09759 | -0.09759 | -0.05718 | -0.10248 | -0.12765 | -0.08334 | -0.19436 | -0.00059 | -0.17156 | -0.03312 | -0.18011 |
| <i>Caranx sexfasciatus</i>          | -0.14237 | -0.18326 | -0.18326 | -0.18326 | -0.18326 | -0.18326 | -0.18326 | -0.18326 | -0.18326 | -0.16186 | -0.23394 | -0.23970 | -0.25386 | 0.10219  | -0.31252 | -0.29254 | -0.14104 | 0.02965  |
| <i>Carassius auratus auratus</i>    | 0.08686  | 0.13582  | 0.13582  | 0.13582  | 0.13582  | 0.13582  | 0.13582  | 0.13582  | 0.13582  | 0.10735  | 0.25443  | 0.35447  | 0.11888  | 0.05921  | 0.36235  | 0.46914  | 0.12002  | -0.20131 |
| <i>Casmerodius albus</i>            | -0.19389 | -0.11496 | -0.11496 | -0.11496 | -0.11496 | -0.11496 | -0.11496 | -0.11496 | -0.11496 | -0.05601 | -0.14675 | -0.15036 | -0.13706 | -0.22894 | -0.20243 | -0.17948 | -0.29609 | 0.09391  |
| <i>Chaetodon vagabundus</i>         | -0.10017 | -0.10448 | -0.10448 | -0.10448 | -0.10448 | -0.10448 | -0.10448 | -0.10448 | -0.10448 | -0.11846 | -0.10987 | -0.13665 | -0.02530 | -0.20807 | -0.19083 | -0.08620 | -0.26910 | -0.17506 |
| <i>Chelon macrolepis</i>            | -0.06571 | -0.07439 | -0.07439 | -0.07439 | -0.07439 | -0.07439 | -0.07439 | -0.07439 | -0.07439 | -0.09648 | -0.06151 | -0.07539 | 0.01527  | -0.21417 | -0.13684 | -0.00634 | -0.23509 | -0.20583 |
| <i>Chorodactylus schoenleini</i>    | -0.01690 | -0.09759 | -0.09759 | -0.09759 | -0.09759 | -0.09759 | -0.09759 | -0.09759 | -0.09759 | -0.11496 | -0.12458 | -0.12765 | -0.04393 | -0.19436 | -0.14100 | -0.18510 | 0.21629  | 0.52852  |
| <i>Chrysiptera glauca</i>           | -0.16460 | -0.09759 | -0.09759 | -0.09759 | -0.09759 | -0.09759 | -0.09759 | -0.09759 | -0.09759 | -0.04755 | -0.12458 | -0.12765 | -0.11636 | -0.19436 | -0.17185 | -0.15237 | -0.25136 | 0.07972  |
| <i>Columba janthina janthina</i>    | -0.00785 | -0.09759 | -0.09759 | -0.09759 | -0.09759 | -0.09759 | -0.09759 | -0.09759 | -0.09759 | -0.11496 | -0.12458 | -0.12765 | -0.17707 | 0.35442  | -0.16805 | -0.15124 | 0.01364  | -0.18011 |
| <i>Corvus splendens</i>             | 0.43393  | 0.45539  | 0.45539  | 0.45539  | 0.45539  | 0.45539  | 0.45539  | 0.45539  | 0.45539  | 0.45207  | 0.43994  | 0.40241  | 0.49444  | 0.16770  | 0.35272  | 0.39679  | 0.20947  | 0.13024  |
| <i>Cynops enscauda</i>              | 0.76688  | 0.73767  | 0.73767  | 0.73767  | 0.73767  | 0.73767  | 0.73767  | 0.73767  | 0.73767  | 0.72429  | 0.71292  | 0.68309  | 0.68124  | 0.68178  | 0.65257  | 0.62024  | 0.63540  | 0.24238  |
| <i>Cyprinus carpio</i>              | 0.05826  | 0.01005  | 0.01005  | 0.01005  | 0.01005  | 0.01005  | 0.01005  | 0.01005  | 0.01005  | -0.00601 | -0.02418 | -0.06218 | 0.02580  | 0.12736  | -0.15994 | -0.04671 | -0.15869 | -0.20034 |
| <i>Egretta garzetta</i>             | -0.16460 | -0.09759 | -0.09759 | -0.09759 | -0.09759 | -0.09759 | -0.09759 | -0.09759 | -0.09759 | -0.04755 | -0.12458 | -0.12765 | -0.11636 | -0.19436 | -0.17185 | -0.15237 | -0.25136 | 0.07972  |
| <i>Eleotris fusca</i>               | -0.28407 | -0.25343 | -0.25343 | -0.25343 | -0.25343 | -0.25343 | -0.25343 | -0.25343 | -0.25343 | -0.21217 | -0.30824 | -0.33470 | -0.23116 | -0.32455 | -0.44619 | -0.35144 | -0.45005 | 0.05807  |
| <i>Gambusia affinis</i>             | -0.15820 | -0.14064 | -0.14064 | -0.14064 | -0.14064 | -0.14064 | -0.14064 | -0.14064 | -0.14064 | -0.13097 | -0.05253 | 0.02105  | -0.11921 | -0.28010 | 0.07172  | 0.07347  | -0.00842 | -0.25957 |
| <i>Glossogobius celebesi</i>        | -0.01690 | -0.09759 | -0.09759 | -0.09759 | -0.09759 | -0.09759 | -0.09759 | -0.09759 | -0.09759 | -0.11496 | -0.12458 | -0.12765 | -0.04393 | -0.19436 | -0.14100 | -0.18510 | 0.21629  | 0.52852  |
| <i>Herpestes javanicus</i>          | -0.00785 | -0.09759 | -0.09759 | -0.09759 | -0.09759 | -0.09759 | -0.09759 | -0.09759 | -0.09759 | -0.11496 | -0.12458 | -0.12765 | -0.17707 | 0.35442  | -0.16805 | -0.15124 | 0.01364  | -0.18011 |
| <i>Homo sapiens</i>                 | 0.13850  | 0.11123  | 0.11123  | 0.11123  | 0.11123  | 0.11123  | 0.11123  | 0.11123  | 0.11123  | 0.10667  | 0.15161  | 0.20016  | 0.04927  | 0.25843  | 0.15183  | 0.22356  | 0.11493  | -0.23635 |
| <i>Hypsipetes amaurotis</i>         | -0.00785 | -0.09759 | -0.09759 | -0.09759 | -0.09759 | -0.09759 | -0.09759 | -0.09759 | -0.09759 | -0.11496 | -0.12458 | -0.12765 | -0.17707 | 0.35442  | -0.16805 | -0.15124 | 0.01364  | -0.18011 |
| <i>Kuhlia marginata</i>             | -0.28136 | -0.32304 | -0.32304 | -0.32304 | -0.32304 | -0.32304 | -0.32304 | -0.32304 | -0.32304 | -0.29702 | -0.39645 | -0.42286 | -0.31630 | -0.23307 | -0.55179 | -0.47201 | -0.33668 | 0.17698  |
| <i>Kuhlia rupestris</i>             | -0.23227 | -0.30467 | -0.30467 | -0.30467 | -0.30467 | -0.30467 | -0.30467 | -0.30467 | -0.30467 | -0.29123 | -0.37286 | -0.39274 | -0.33892 | -0.01838 | -0.51436 | -0.43988 | -0.26985 | 0.03602  |
| <i>Misgurnus anguillicaudatus</i>   | 0.66727  | 0.68313  | 0.68313  | 0.68313  | 0.68313  | 0.68313  | 0.68313  | 0.68313  | 0.68313  | 0.67951  | 0.67408  | 0.64967  | 0.67072  | 0.42759  | 0.64177  | 0.60609  | 0.54364  | 0.29231  |
| <i>Monopterus albus</i>             | 0.26182  | 0.32455  | 0.32455  | 0.32455  | 0.32455  | 0.32455  | 0.32455  | 0.32455  | 0.32455  | 0.33696  | 0.30947  | 0.26048  | 0.31562  | 0.21266  | 0.36057  | 0.23630  | 0.16491  | -0.05241 |
| <i>Mugil cephalus</i>               | -0.13587 | -0.26094 | -0.26094 | -0.26094 | -0.26094 | -0.26094 | -0.26094 | -0.26094 | -0.26094 | -0.27210 | -0.32501 | -0.34189 | -0.32166 | 0.20604  | -0.44378 | -0.39430 | -0.10280 | -0.01302 |
| <i>Mullidichthys vanicolensis</i>   | -0.09715 | -0.09759 | -0.09759 | -0.09759 | -0.09759 | -0.09759 | -0.09759 | -0.09759 | -0.09759 | -0.11496 | 0.01071  | 0.11622  | -0.08228 | -0.19436 | 0.08573  | 0.20993  | 0.01364  | -0.18011 |
| <i>Mus musculus domesticus</i>      | -0.06439 | -0.07072 | -0.07072 | -0.07072 | -0.07072 | -0.07072 | -0.07072 | -0.07072 | -0.07072 | -0.08922 | -0.07352 | -0.10186 | 0.00726  | -0.16481 | -0.14887 | -0.04834 | -0.23788 | -0.19559 |
| <i>Nematolosa come</i>              | -0.08872 | -0.09759 | -0.09759 | -0.09759 | -0.09759 | -0.09759 | -0.09759 | -0.09759 | -0.09759 | -0.11496 | -0.10113 | -0.12765 | -0.01731 | -0.19436 | -0.17869 | -0.07562 | -0.25136 | -0.18011 |
| <i>Neoniphon sammara</i>            | -0.09715 | -0.09759 | -0.09759 | -0.09759 | -0.09759 | -0.09759 | -0.09759 | -0.09759 | -0.09759 | -0.11496 | 0.01071  | 0.11622  | -0.08228 | -0.19436 | 0.08573  | 0.20993  | 0.01364  | -0.18011 |
| <i>Oncorhynchus mykiss</i>          | -0.12744 | -0.09759 | -0.09759 | -0.09759 | -0.09759 | -0.09759 | -0.09759 | -0.09759 | -0.09759 | -0.05718 | -0.10248 | -0.12765 | -0.08334 | -0.19436 | -0.00059 | -0.17156 | -0.03312 | -0.18011 |
| <i>Oncorhynchus nerka</i>           | -0.12744 | -0.09759 | -0.09759 | -0.09759 | -0.09759 | -0.09759 | -0.09759 | -0.09759 | -0.09759 | -0.05718 | -0.10248 | -0.12765 | -0.08334 | -0.19436 | -0.00059 | -0.17156 | -0.03312 | -0.18011 |
| <i>Ophileotris sp. Tametomohaze</i> | -0.00785 | -0.09759 | -0.09759 | -0.09759 | -0.09759 | -0.09759 | -0.09759 | -0.09759 | -0.09759 | -0.11496 | -0.12458 | -0.12765 | -0.17707 | 0.35442  | -0.16805 | -0.15124 | 0.01364  | -0.18011 |
| <i>Oreochromis aureus</i>           | -0.08872 | -0.09759 | -0.09759 | -0.09759 | -0.09759 | -0.09759 | -0.09759 | -0.09759 | -0.09759 | -0.11496 | -0.10113 | -0.12765 | -0.01731 | -0.19436 | -0.17869 | -0.07562 | -0.25136 | -0.18011 |
| <i>Oreochromis niloticus</i>        | 0.02207  | -0.03963 | -0.03963 | -0.03963 | -0.03963 | -0.03963 | -0.03963 | -0.03963 | -0.03963 | 0.07426  | -0.00106 | 0.02863  | -0.00741 | 0.00576  | -0.05018 | 0.09226  | -0.03474 | -0.23358 |
| <i>Oreochromis sp. red tilapia</i>  | -0.12917 | -0.12745 | -0.12745 | -0.12745 | -0.12745 | -0.12745 | -0.12745 | -0.12745 | -0.12745 | -0.13027 | -0.13253 | -0.16670 | -0.04530 | -0.25382 | -0.17215 | -0.13173 | -0.25236 | -0.23522 |
| <i>Ostorhinchus cookii</i>          | -0.08872 | -0.09759 | -0.09759 | -0.09759 | -0.09759 | -0.09759 | -0.09759 | -0.09759 | -0.09759 | -0.11496 | -0.10113 | -0.12765 | -0.01731 | -0.19436 | -0.17869 | -0.07562 | -0.25136 | -0.18011 |
| <i>Ostorhinchus doederleini</i>     | -0.08872 | -0.09759 | -0.09759 | -0.09759 | -0.09759 | -0.09759 | -0.09759 | -0.09759 | -0.09759 | -0.11496 | -0.10113 | -0.12765 | -0.01731 | -0.19436 | -0.17869 | -0.07562 | -0.25136 | -0.18011 |
| <i>Ostracion immaculatus</i>        | -0.09715 | -0.09759 | -0.09759 | -0.09759 | -0.09759 | -0.09759 | -0.09759 | -0.09759 | -0.09759 | -0.11496 | 0.01071  | 0.11622  | -0.08228 | -0.19436 | 0.08573  | 0.20993  | 0.01364  | -0.18011 |
| <i>Parupeneus ciliatus</i>          | -0.12744 | -0.09759 | -0.09759 | -0.09759 | -0.09759 | -0.09759 | -0.09759 | -0.09759 | -0.09759 | -0.05718 | -0.10248 | -0.12765 | -0.08334 | -0.19436 | -0.00059 | -0.17156 | -0.03312 | -0.18011 |
| <i>Pelodiscus sinensis</i>          | -0.17102 | -0.21921 | -0.21921 | -0.21921 | -0.21921 | -0.21921 | -0.21921 | -0.21921 | -0.21921 | -0.21245 | -0.26986 | -0.28672 | -0.31112 | 0.23945  | -0.30701 | -0.32995 | -0.14923 | -0.12476 |
| <i>Pempheris xanthoptera</i>        | -0.11681 | -0.12849 | -0.12849 | -0.12849 | -0.12849 | -0.12849 | -0.12849 | -0.12849 | -0.12849 | -0.15136 | -0.13315 | -0.16806 | -0.02279 | -0.25590 | -0.23527 | -0.09956 | -0.33095 | -0.23714 |
| <i>Plecoglossus altivelis</i>       | -0.01131 | -0.14064 | -0.14064 | -0.14064 | -0.14064 | -0.14064 | -0.14064 | -0.14064 | -0.14064 | -0.16567 | -0.17954 | -0.18396 | -0.25518 | 0.51077  | -0.24218 | -0.21796 | 0.01966  | -0.25957 |
| <i>Poecilia reticulata</i>          | -0.21813 | -0.19357 | -0.19357 | -        |          |          |          |          |          |          |          |          |          |          |          |          |          |          |



|                                      | *<br>otu_3017 | *<br>otu_314 | *<br>otu_1059 | *<br>otu_1286 | *<br>otu_2514 | *<br>otu_2802 | *<br>otu_2895 | *<br>otu_2898 | *<br>otu_2912 | *<br>otu_3275 | *<br>otu_3524 | *<br>otu_3716 | *<br>otu_3253 | *<br>otu_2885 | *<br>otu_3246 | *<br>otu_3802 | *<br>otu_2466 | *<br>otu_2871 |
|--------------------------------------|---------------|--------------|---------------|---------------|---------------|---------------|---------------|---------------|---------------|---------------|---------------|---------------|---------------|---------------|---------------|---------------|---------------|---------------|
| <i>Acanthopagrus sivilotus</i>       | -0.44493      | -0.27663     | -0.27663      | -0.27663      | -0.27663      | -0.27663      | -0.27663      | -0.27663      | -0.27663      | -0.16040      | -0.27359      | -0.23998      | -0.30608      | -0.23492      | -0.30600      | -0.22464      | -0.48753      | 0.09933       |
| <i>Acanthurus dussumieri</i>         | 0.25786       | 0.25522      | 0.25522       | 0.25522       | 0.25522       | 0.25522       | 0.25522       | 0.25522       | 0.25522       | 0.22648       | 0.40231       | 0.51275       | 0.27365       | -0.10010      | 0.44057       | 0.50730       | 0.36957       | -0.03569      |
| <i>Anguilla japonica</i>             | 0.37454       | 0.11527      | 0.11527       | 0.11527       | 0.11527       | 0.11527       | 0.11527       | 0.11527       | 0.11527       | 0.05508       | 0.04134       | 0.02794       | -0.08938      | 0.56698       | -0.07298      | -0.01219      | 0.24343       | -0.24284      |
| <i>Anguilla luzonensis</i>           | 0.37770       | 0.40875      | 0.40875       | 0.40875       | 0.40875       | 0.40875       | 0.40875       | 0.40875       | 0.40875       | 0.38097       | 0.50451       | 0.56334       | 0.39781       | 0.03476       | 0.50698       | 0.55850       | 0.28901       | -0.21554      |
| <i>Anguilla marmorata</i>            | 0.40654       | 0.57643      | 0.57643       | 0.57643       | 0.57643       | 0.57643       | 0.57643       | 0.57643       | 0.57643       | 0.54005       | 0.52084       | 0.46439       | 0.29063       | 0.66308       | 0.51700       | 0.47404       | -0.04333      | -0.58467      |
| <i>Apogon doryssa</i>                | 0.25301       | 0.22883      | 0.22883       | 0.22883       | 0.22883       | 0.22883       | 0.22883       | 0.22883       | 0.22883       | 0.19460       | 0.17290       | 0.09916       | 0.40880       | -0.12177      | -0.00027      | 0.12759       | -0.13300      | -0.06132      |
| <i>Awaous melanocephalus</i>         | -0.54546      | -0.49886     | -0.49886      | -0.49886      | -0.49886      | -0.49886      | -0.49886      | -0.49886      | -0.49886      | -0.38378      | -0.53045      | -0.48301      | -0.58361      | -0.14518      | -0.63884      | -0.47367      | -0.55887      | 0.21006       |
| <i>Bothus pantherinus</i>            | 0.22914       | 0.20534      | 0.20534       | 0.20534       | 0.20534       | 0.20534       | 0.20534       | 0.20534       | 0.20534       | 0.17380       | 0.13702       | 0.05417       | 0.38261       | -0.11236      | -0.03841      | 0.08289       | -0.16418      | -0.05785      |
| <i>Canis lupus familiaris</i>        | -0.04980      | 0.04822      | 0.04822       | 0.04822       | 0.04822       | 0.04822       | 0.04822       | 0.04822       | 0.04822       | 0.09550       | 0.04900       | 0.04771       | 0.16669       | -0.28090      | -0.09179      | 0.07800       | -0.33584      | 0.01352       |
| <i>Canthigaster amboinensis</i>      | -0.06125      | 0.10705      | 0.10705       | 0.10705       | 0.10705       | 0.10705       | 0.10705       | 0.10705       | 0.10705       | 0.06996       | 0.05016       | -0.00556      | -0.02803      | 0.31513       | 0.09273       | 0.03548       | -0.22901      | -0.10173      |
| <i>Caragobius urolepis</i>           | -0.11248      | -0.03776     | -0.03776      | -0.03776      | -0.03776      | -0.03776      | -0.03776      | -0.03776      | -0.03776      | 0.06808       | -0.04918      | -0.09380      | -0.00427      | -0.17325      | 0.11923       | -0.15170      | 0.07894       | -0.16689      |
| <i>Caranx sextasciatus</i>           | -0.23904      | -0.33974     | -0.33974      | -0.33974      | -0.33974      | -0.33974      | -0.33974      | -0.33974      | -0.33974      | -0.29989      | -0.37803      | -0.34061      | -0.48967      | 0.14915       | -0.45281      | -0.35573      | -0.18165      | 0.09586       |
| <i>Carassius auratus auratus</i>     | 0.36426       | 0.48436      | 0.48436       | 0.48436       | 0.48436       | 0.48436       | 0.48436       | 0.48436       | 0.48436       | 0.43575       | 0.61746       | 0.69895       | 0.41772       | 0.10719       | 0.69893       | 0.70996       | 0.32209       | -0.22404      |
| <i>Casmerodius albus</i>             | -0.52413      | -0.32587     | -0.32587      | -0.32587      | -0.32587      | -0.32587      | -0.32587      | -0.32587      | -0.32587      | -0.18895      | -0.32229      | -0.28270      | -0.36056      | -0.27674      | -0.36047      | -0.26462      | -0.57431      | 0.11701       |
| <i>Chaetodon vagabundus</i>          | 0.19863       | 0.18650      | 0.18650       | 0.18650       | 0.18650       | 0.18650       | 0.18650       | 0.18650       | 0.18650       | 0.16300       | 0.11825       | 0.03756       | 0.36210       | -0.12896      | -0.05981      | 0.06742       | -0.19849      | -0.05105      |
| <i>Chelon macrolepis</i>             | 0.31023       | 0.28650      | 0.28650       | 0.28650       | 0.28650       | 0.28650       | 0.28650       | 0.28650       | 0.28650       | 0.24657       | 0.23428       | 0.15926       | 0.48224       | -0.13040      | 0.04545       | 0.18988       | -0.11885      | -0.08585      |
| <i>Choerodon schoenleinii</i>        | -0.31921      | -0.51936     | -0.51936      | -0.51936      | -0.51936      | -0.51936      | -0.51936      | -0.51936      | -0.51936      | -0.59375      | -0.45755      | -0.38933      | -0.36233      | -0.29942      | -0.39737      | -0.37248      | 0.21413       | -0.64225      |
| <i>Chrysiptera glauca</i>            | -0.44493      | -0.27663     | -0.27663      | -0.27663      | -0.27663      | -0.27663      | -0.27663      | -0.27663      | -0.27663      | -0.16040      | -0.27359      | -0.23998      | -0.30608      | -0.23492      | -0.30600      | -0.22464      | -0.48753      | 0.09933       |
| <i>Columba janthina janthina</i>     | 0.22342       | -0.00177     | -0.00177      | -0.00177      | -0.00177      | -0.00177      | -0.00177      | -0.00177      | -0.00177      | -0.04510      | -0.06616      | -0.07184      | -0.19228      | 0.47741       | -0.13961      | -0.10866      | 0.19050       | -0.15064      |
| <i>Corvus splendens</i>              | 0.25532       | 0.31232      | 0.31232       | 0.31232       | 0.31232       | 0.31232       | 0.31232       | 0.31232       | 0.31232       | 0.31015       | 0.25741       | 0.18821       | 0.40441       | -0.02611      | 0.10237       | 0.21084       | -0.20147      | -0.21193      |
| <i>Cynops enscatauda</i>             | 0.52304       | 0.42526      | 0.42526       | 0.42526       | 0.42526       | 0.42526       | 0.42526       | 0.42526       | 0.42526       | 0.38062       | 0.36524       | 0.32595       | 0.24617       | 0.53321       | 0.26778       | 0.29808       | 0.18627       | -0.46099      |
| <i>Cyprinus carpio</i>               | 0.32792       | 0.20630      | 0.20630       | 0.20630       | 0.20630       | 0.20630       | 0.20630       | 0.20630       | 0.20630       | 0.17641       | 0.08883       | 0.00418       | 0.23088       | 0.19582       | -0.16083      | 0.01119       | -0.17006      | -0.20702      |
| <i>Egretta garzetta</i>              | -0.44493      | -0.27663     | -0.27663      | -0.27663      | -0.27663      | -0.27663      | -0.27663      | -0.27663      | -0.27663      | -0.16040      | -0.27359      | -0.23998      | -0.30608      | -0.23492      | -0.30600      | -0.22464      | -0.48753      | 0.09933       |
| <i>Eleotris fusca</i>                | -0.43135      | -0.35309     | -0.35309      | -0.35309      | -0.35309      | -0.35309      | -0.35309      | -0.35309      | -0.35309      | -0.25981      | -0.40500      | -0.40616      | -0.28486      | -0.30689      | -0.58357      | -0.37110      | -0.64535      | 0.21307       |
| <i>Gambusia affinis</i>              | 0.14857       | 0.19233      | 0.19233       | 0.19233       | 0.19233       | 0.19233       | 0.19233       | 0.19233       | 0.19233       | 0.23319       | 0.30953       | 0.37353       | 0.22851       | -0.19116      | 0.44549       | 0.33512       | 0.36072       | -0.13285      |
| <i>Glossogobius celebius</i>         | -0.31921      | -0.51936     | -0.51936      | -0.51936      | -0.51936      | -0.51936      | -0.51936      | -0.51936      | -0.51936      | -0.59375      | -0.45755      | -0.38933      | -0.36233      | -0.29942      | -0.39737      | -0.37248      | 0.21413       | -0.64225      |
| <i>Herpestes javanicus</i>           | 0.22342       | -0.00177     | -0.00177      | -0.00177      | -0.00177      | -0.00177      | -0.00177      | -0.00177      | -0.00177      | -0.04510      | -0.06616      | -0.07184      | -0.19228      | 0.47741       | -0.13961      | -0.10866      | 0.19050       | -0.15064      |
| <i>Homo sapiens</i>                  | 0.35645       | 0.28719      | 0.28719       | 0.28719       | 0.28719       | 0.28719       | 0.28719       | 0.28719       | 0.28719       | 0.28989       | 0.30970       | 0.35004       | 0.12636       | 0.30331       | 0.25905       | 0.31311       | 0.21975       | -0.33604      |
| <i>Hypsipetes amaurotis</i>          | 0.22342       | -0.00177     | -0.00177      | -0.00177      | -0.00177      | -0.00177      | -0.00177      | -0.00177      | -0.00177      | -0.04510      | -0.06616      | -0.07184      | -0.19228      | 0.47741       | -0.13961      | -0.10866      | 0.19050       | -0.15064      |
| <i>Kuhlia marginata</i>              | -0.43525      | -0.53780     | -0.53780      | -0.53780      | -0.53780      | -0.53780      | -0.53780      | -0.53780      | -0.53780      | -0.49402      | -0.58955      | -0.56485      | -0.49668      | -0.20248      | -0.76652      | -0.54298      | -0.44168      | 0.38077       |
| <i>Kuhlia rupestris</i>              | -0.23316      | -0.41431     | -0.41431      | -0.41431      | -0.41431      | -0.41431      | -0.41431      | -0.41431      | -0.41431      | -0.39640      | -0.48452      | -0.46629      | -0.47800      | 0.06994       | -0.66042      | -0.46729      | -0.26438      | 0.21335       |
| <i>Misgurnus anguillicaudatus</i>    | 0.30197       | 0.35263      | 0.35263       | 0.35263       | 0.35263       | 0.35263       | 0.35263       | 0.35263       | 0.35263       | 0.34103       | 0.34061       | 0.31144       | 0.31582       | 0.16205       | 0.30292       | 0.30991       | 0.04276       | -0.29317      |
| <i>Monopterus albus</i>              | 0.10186       | 0.26239      | 0.26239       | 0.26239       | 0.26239       | 0.26239       | 0.26239       | 0.26239       | 0.26239       | 0.30359       | 0.20458       | 0.11215       | 0.23302       | 0.10663       | 0.28590       | 0.09839       | -0.07415      | -0.33815      |
| <i>Mugil cephalus</i>                | -0.00633      | -0.32038     | -0.32038      | -0.32038      | -0.32038      | -0.32038      | -0.32038      | -0.32038      | -0.32038      | -0.36278      | -0.40016      | -0.38761      | -0.45165      | 0.32931       | -0.55054      | -0.41026      | 0.03651       | -0.13413      |
| <i>Mulloidichthys vanicolensis</i>   | 0.25786       | 0.25522      | 0.25522       | 0.25522       | 0.25522       | 0.25522       | 0.25522       | 0.25522       | 0.25522       | 0.22648       | 0.40231       | 0.51275       | 0.27365       | -0.10010      | 0.44057       | 0.50730       | 0.36957       | -0.03569      |
| <i>Mus musculus domesticus</i>       | 0.25982       | 0.24238      | 0.24238       | 0.24238       | 0.24238       | 0.24238       | 0.24238       | 0.24238       | 0.24238       | 0.20952       | 0.16960       | 0.08044       | 0.41206       | -0.08504      | -0.00557      | 0.10829       | -0.15913      | -0.09429      |
| <i>Nematostella come</i>             | 0.22914       | 0.20534      | 0.20534       | 0.20534       | 0.20534       | 0.20534       | 0.20534       | 0.20534       | 0.20534       | 0.17380       | 0.13702       | 0.05417       | 0.38261       | -0.11236      | -0.03841      | 0.08289       | -0.16418      | -0.05785      |
| <i>Neoniphon sammara</i>             | 0.25786       | 0.25522      | 0.25522       | 0.25522       | 0.25522       | 0.25522       | 0.25522       | 0.25522       | 0.25522       | 0.22648       | 0.40231       | 0.51275       | 0.27365       | -0.10010      | 0.44057       | 0.50730       | 0.36957       | -0.03569      |
| <i>Oncorhynchus mykiss</i>           | -0.11248      | -0.03776     | -0.03776      | -0.03776      | -0.03776      | -0.03776      | -0.03776      | -0.03776      | -0.03776      | 0.06808       | -0.04918      | -0.09380      | -0.00427      | -0.17325      | 0.11923       | -0.15170      | 0.07894       | -0.16689      |
| <i>Oncorhynchus nerka</i>            | -0.11248      | -0.03776     | -0.03776      | -0.03776      | -0.03776      | -0.03776      | -0.03776      | -0.03776      | -0.03776      | 0.06808       | -0.04918      | -0.09380      | -0.00427      | -0.17325      | 0.11923       | -0.15170      | 0.07894       | -0.16689      |
| <i>Ophieleotris sp. Tametomohaze</i> | 0.22342       | -0.00177     | -0.00177      | -0.00177      | -0.00177      | -0.00177      | -0.00177      | -0.00177      | -0.00177      | -0.04510      | -0.06616      | -0.07184      | -0.19228      | 0.47741       | -0.13961      | -0.10866      | 0.19050       | -0.15064      |
| <i>Oreochromis aureus</i>            | 0.22914       | 0.20534      | 0.20534       | 0.20534       | 0.20534       | 0.20534       | 0.20534       | 0.20534       | 0.20534       | 0.17380       | 0.13702       | 0.05417       | 0.38261       | -0.11236      | -0.03841      | 0.08289       | -0.16418      | -0.05785      |
| <i>Oreochromis niloticus</i>         | 0.47924       | 0.32107      | 0.32107       | 0.32107       | 0.32107       | 0.32107       | 0.32107       | 0.32107       | 0.32107       | 0.24943       | 0.31621       | 0.30814       | 0.37715       | 0.11667       | 0.16150       | 0.30568       | 0.22240       | -0.14997      |
| <i>Oreochromis sp. red tilapia</i>   | 0.18217       | 0.18536      | 0.18536       | 0.18536       | 0.18536       | 0.18536       | 0.18536       | 0.18536       | 0.18536       | 0.19199       | 0.11527       | 0.01949       | 0.36857       | -0.16945      | 0.00467       | 0.02696       | -0.13111      | -0.11450      |
| <i>Ostorhinchus cookii</i>           | 0.22914       | 0.20534      | 0.20534       | 0.20534       | 0.20534       | 0.20534       | 0.20534       | 0.20534       | 0.20534       | 0.17380       | 0.13702       | 0.05417       | 0.38261       | -0.11236      | -0.03841      | 0.08289       | -0.16418      | -0.05785      |
| <i>Ostorhinchus doederleini</i>      | 0.22914       | 0.20534      | 0.20534       | 0.20534       | 0.20534       | 0.20534       | 0.20534       | 0.20534       | 0.20534       | 0.17380       | 0.13702       | 0.05417       | 0.38261       | -0.11236      | -0.03841      | 0.08289       | -0.16418      | -0.05785      |
| <i>Ostracion immaculatus</i>         | 0.25786       | 0.25522      | 0.25522       | 0.25522       | 0.25522       | 0.25522       | 0.25522       | 0.25522       | 0.25522       | 0.22648       | 0.40231       | 0.51275       | 0.27365       | -0.10010      | 0.44057       | 0.50730       | 0.36957       | -0.03569      |
| <i>Parupeneus ciliatus</i>           | -0.11248      | -0.03776     | -0.03776      | -0.03776      | -0.03776      | -0.03776      | -0.03776      | -0.03776      | -0.03776      | 0.06808       | -0.04918      | -0.09380      | -0.00427      | -0.17325      | 0.11923       | -0.15170      | 0.07894       | -0.16689      |
| <i>Pelodiscus sinensis</i>           | -0.10595      | -0.22659     | -0.22659      | -0.22659      | -0.22659      | -0.22659      | -0.22659      | -0.22659      | -0.22659      | -0.21714      | -0.29753      | -0.29856      | -0.43667      | 0.36542       | -0.32683      | -0.32467      | -0.05763      | -0.03391      |
| <i>Pempheris xanthoptera</i>         | 0.30618       | 0.27437      | 0.27437       | 0.27437       | 0.27437       | 0.27437       | 0.27437       | 0.27437       | 0.27437       | 0.23224       | 0.18308       | 0.07238       | 0.51125       | -0.15014      | -0.05132      | 0.11076       | -0.21938      | -0.07730      |
| <i>Plecoglossus altivelis</i>        | 0.32397       | -0.00257     | -0.00257      | -0.00257      | -0.00257      | -0.00257      | -0.00257      | -0.00257      | -0.00257      | -0.06540      | -0.09594      | -0.10417      | -0.27881      | 0.69226       | -0.20244      | -0.15756      | 0.27623       | -0.21843      |
|                                      |               |              |               |               |               |               |               |               |               |               |               |               |               |               |               |               |               |               |



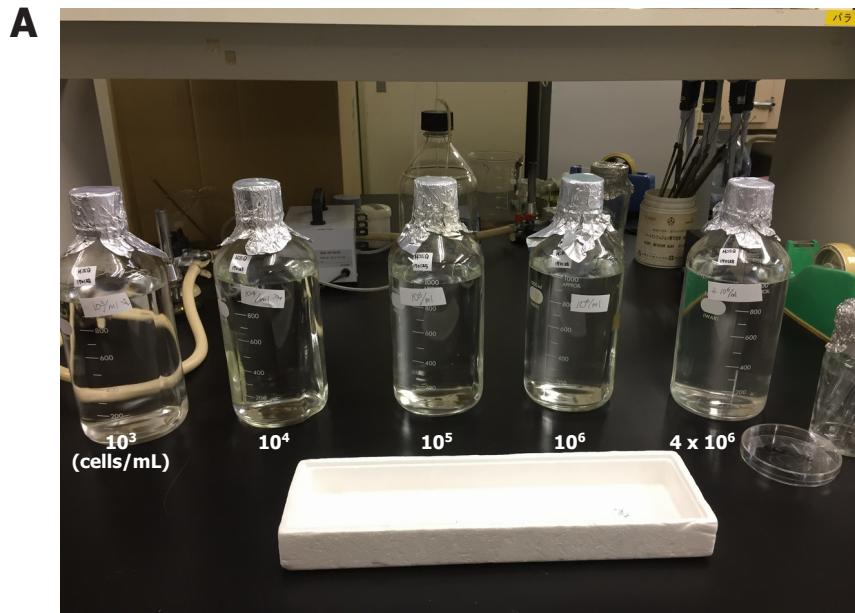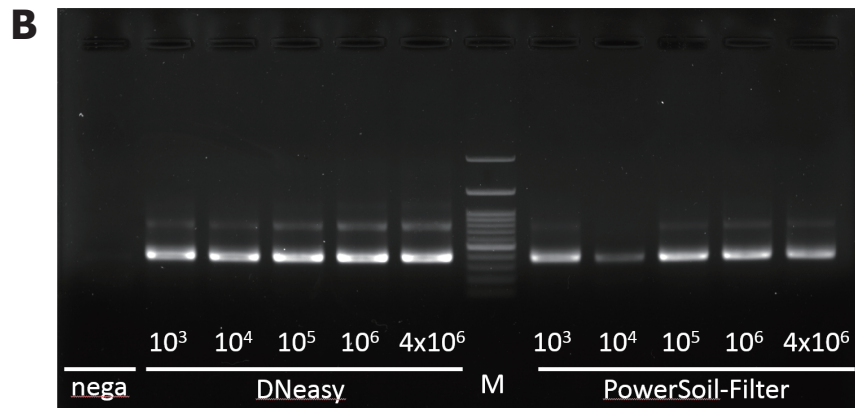

**C**

Download ▾ GenBank Graphics

*Leptospira interrogans* strain APBSMLB194 16S ribosomal RNA gene, partial sequence  
 Sequence ID: [MG705973.1](#) Length: 1416 Number of Matches: 1

Range 1: 466 to 718 GenBank Graphics    ▾ Next Match ▲ Previous Match

|       | Score         | Expect                                                            | Identities    | Gaps      | Strand    |
|-------|---------------|-------------------------------------------------------------------|---------------|-----------|-----------|
|       | 468 bits(253) | 5e-128                                                            | 253/253(100%) | 0/253(0%) | Plus/Plus |
| Query | 1             | TACGTATGGTCCAAGCGTTGTTCCGGAATCATTGGGCGTAAAGGGTCCGTAGGCCGACATG     | 60            |           |           |
| Sbjct | 466           | TACGTATGGTCCAAGCGTTGTTCCGGAATCATTGGGCGTAAAGGGTCCGTAGGCCGACATG     | 525           |           |           |
| Query | 61            | TAAGTCAGGTGTGAAAACAGCGGGCTCAACTCGCAGCCTGCACCTGAAACTATGTGTCTG      | 120           |           |           |
| Sbjct | 526           | TAAGTCAGGTGTGAAAACAGCGGGCTCAACTCGCAGCCTGCACCTGAAACTATGTGTCTG      | 585           |           |           |
| Query | 121           | GAGTTTGGGAGAGGCCAAGTGGAAATCCAGGTGTAGCGGTGAAATGCGTAGATATCTGGAG     | 180           |           |           |
| Sbjct | 586           | GAGTTTGGGAGAGGCCAAGTGGAAATCCAGGTGTAGCGGTGAAATGCGTAGATATCTGGAG     | 645           |           |           |
| Query | 181           | GAACACCAGTGGCGAAGGGGACTTGC TGGCC TAAAAC TGACCGT GAGGCACGAAAAGCGTG | 240           |           |           |
| Sbjct | 646           | GAACACCAGTGGCGAAGGGGACTTGC TGGCC TAAAAC TGACCGT GAGGCACGAAAAGCGTG | 705           |           |           |
| Query | 241           | GGTAGTGAACGGG                                                     | 253           |           |           |
| Sbjct | 706           | GGTAGTGAACGGG                                                     | 718           |           |           |
